# Supplementary material for: 1,2-Migratory ring expansion of a BN-naphthalene
Source: Royal Society of Chemistry journal article supplement (doi:10.1039/d5ob01286d), 2025-01-01
Supplement: d5ob01286d1.pdf [file d5ob01286d1.pdf]

## Supplemental Information

### 1,2-Migratory Ring Expansion of a BN-Naphthalene

*Braden Mediavilla, Maxime A. Siegler, Rebekka S. Klausen\**

| Table of Contents |                                                            | Page |
|-------------------|------------------------------------------------------------|------|
| I.                | Supplemental Figures.....                                  | 1    |
| II.               | General Information.....                                   | 6    |
| III.              | Experimental Procedures.....                               | 7    |
| IV.               | NMR Spectra.....                                           | 13   |
| V.                | Computational Methods.....                                 | 38   |
| VI.               | Computational Data.....                                    | 39   |
| VII.              | Single Crystal X-Ray Crystallography Methods and Data..... | 45   |
| VIII.             | References.....                                            | 52   |

## 1 | Supplemental Figures

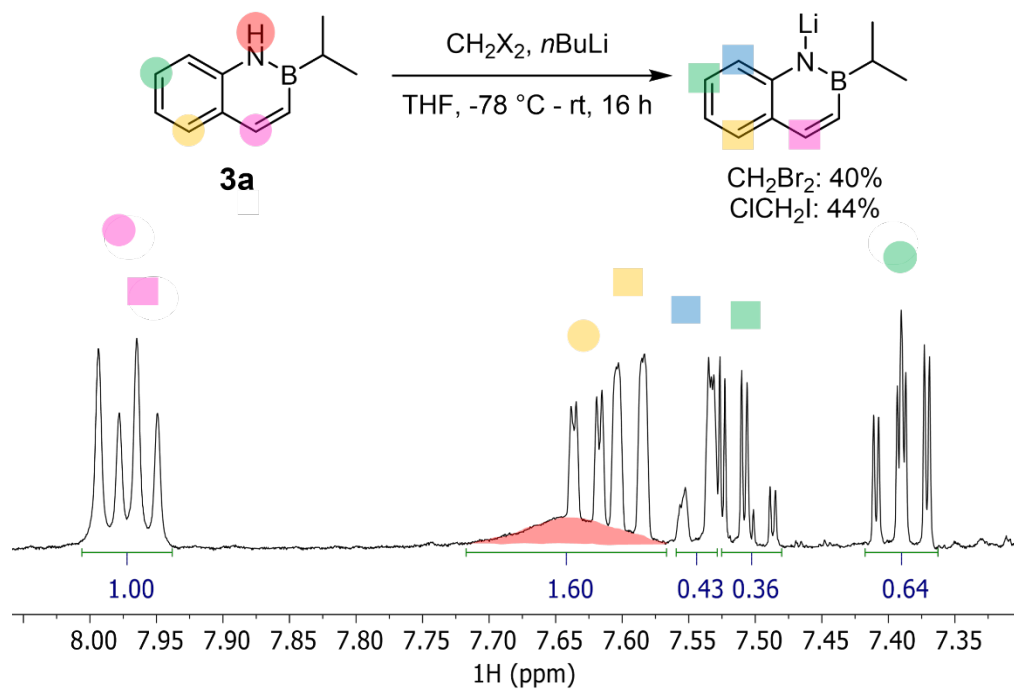

**Figure S1.** Cropped  $^1\text{H}$  NMR spectrum of the roughly 60:40 mixture produced by subjecting **3a** to standard Matteson Homologation conditions, emphasizing that the proton on the BN starting material (red highlighted area) is not present in the product.

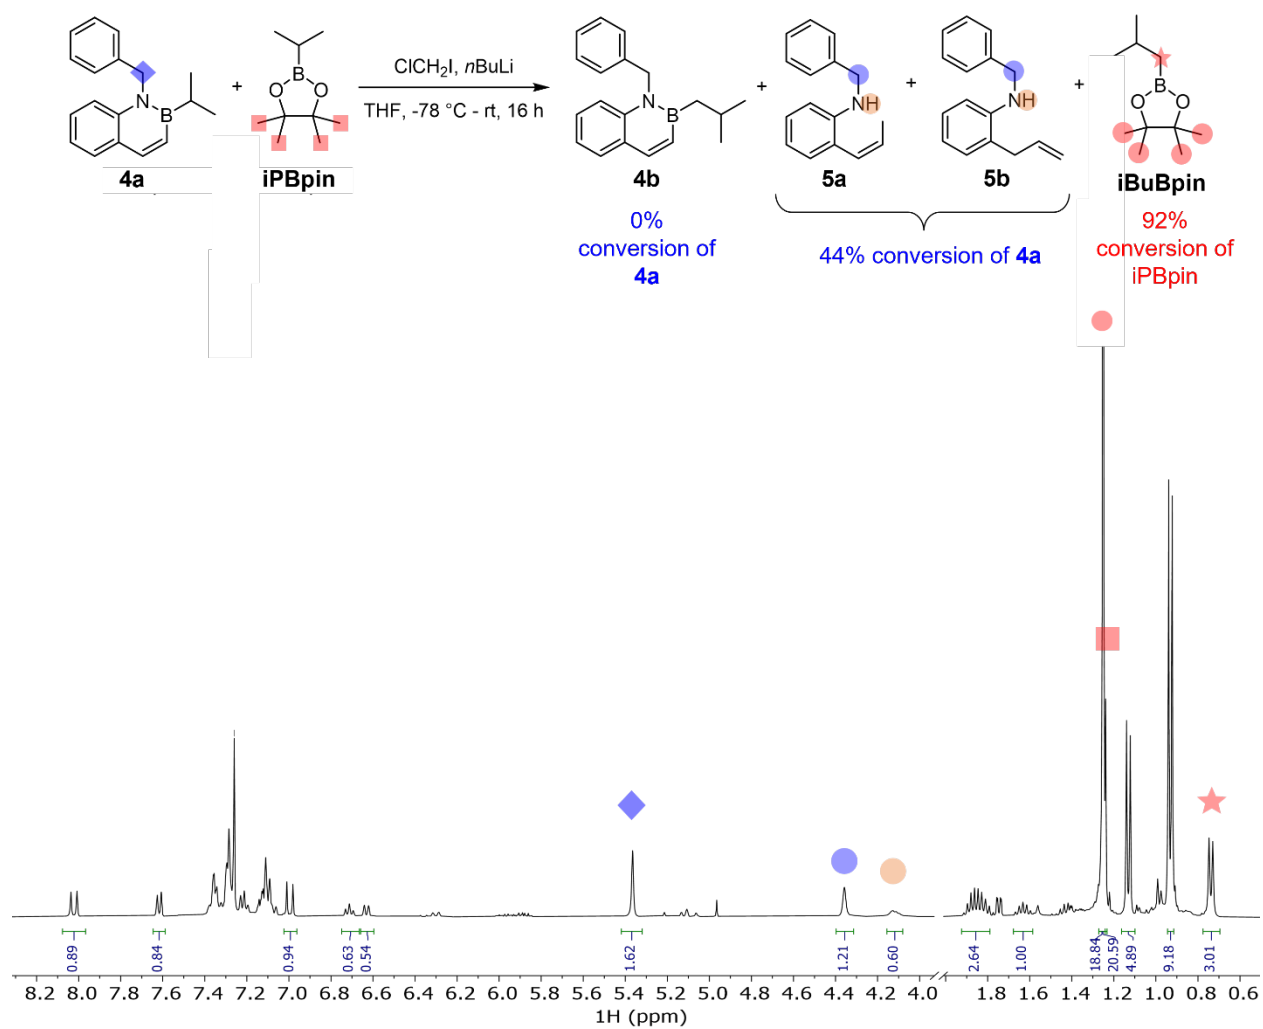

**Figure S2.** Cropped  $^1\text{H}$  NMR spectrum of the crude product mixture from the Matteson homologation of **iPBpin** in the presence of **4a**.

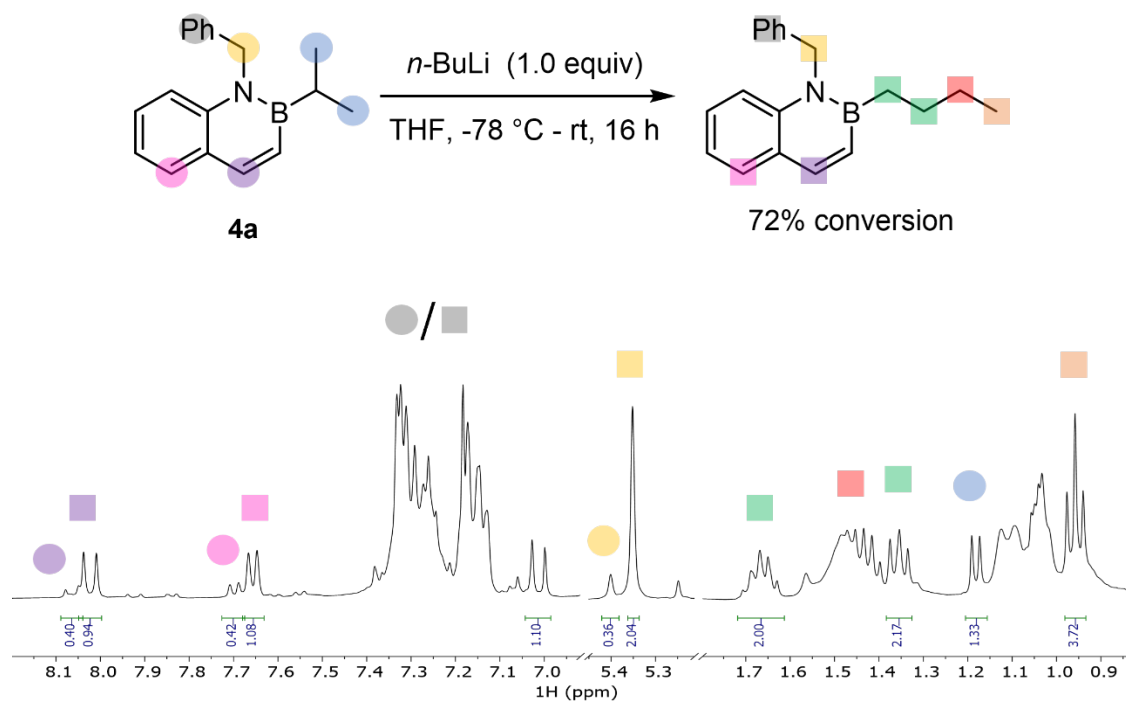

**Figure S3.** Cropped  $^1\text{H}$  NMR spectrum of the crude product mixture from substitution of **4a** with 1.0 equivalents of  $n\text{-BuLi}$  to form (N-Bn)- $n\text{BuBN}$ .

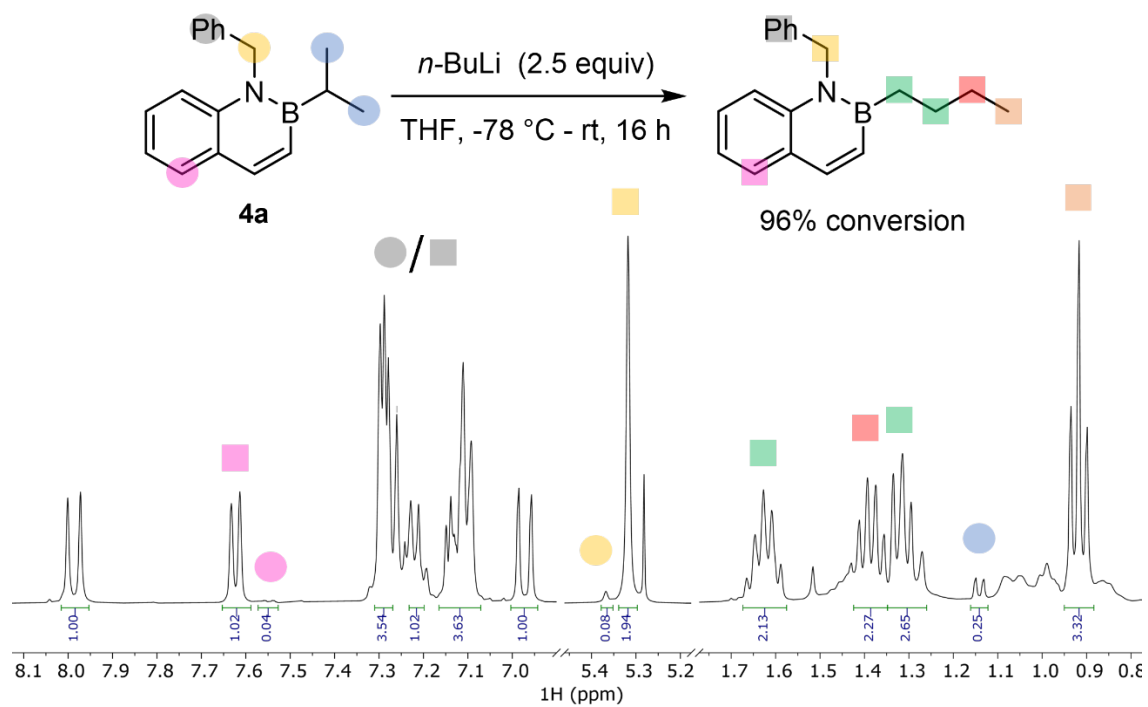

**Figure S4.** Cropped  $^1\text{H}$  NMR spectrum of the crude product mixture from substitution of **4a** with 2.5 equivalents of  $n\text{-BuLi}$  to form (N-Bn)- $n\text{BuBN}$ .

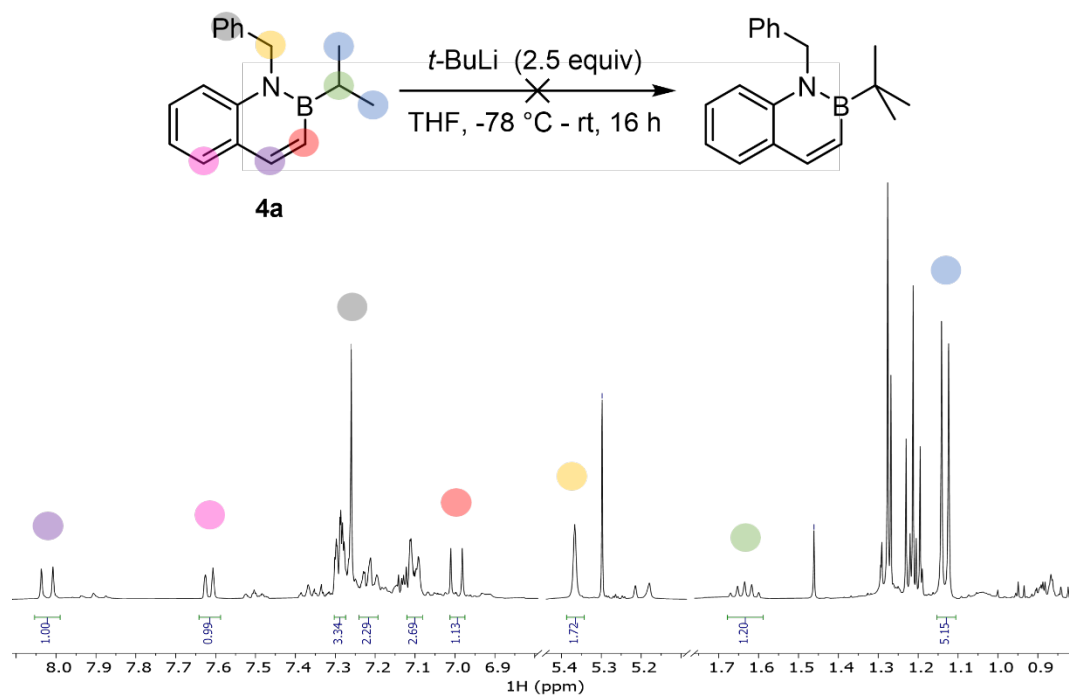

**Figure S5.** Cropped <sup>1</sup>H NMR spectrum of the crude product mixture from reaction of **4a** with 2.5 equivalents of *t*-BuLi, which did not result in substitution to form (N-Bn)-*t*BuBN and instead the starting material was recovered.

## 2 | General Information

All experiments were performed using standard Schlenk techniques, except the synthesis of **1**, which was carried out under aerobic conditions. Air-sensitive reagents which were not dispensed using standard Schlenk techniques were stored and dispensed under an inert nitrogen atmosphere using an MBraun UNIlab Pro glovebox. Moisture-sensitive potassium trifluoroborate reagents were stored in a desiccator with Drierite<sup>TM</sup>. Glassware for air- and moisture-sensitive experiments were dried overnight in an oven at 175 °C. Reactions maintained at cryogenic temperatures for >8 hr were cooled with a Neslab CryoControl 100 Immersion Cooler. Solvents THF and toluene were dried on a J. C. Meyer Solvent Dispensing System (SDS) with alumina-packed stainless-steel columns. All column chromatography was performed on a Teledyne ISCO Combiflash Rf+ using Redisep Rf silica columns. Prep TLC was performed with 20x20 1000  $\mu$ m silica gel FG plates by Uniplate. Mass spectrometry and high-resolution mass spectrometry were performed in the Johns Hopkins University Department of Chemistry with a VG Instruments VG70S/E magnetic sector mass spectrometer with electric ionization (EI, 70 eV). NMR spectra were recorded at room temperature on a Bruker Avance 400 MHz spectrometer. The proton and carbon chemical shifts are reported here in ppm and referenced using the respective signals of the deuterated solvent (<sup>1</sup>H: CDCl<sub>3</sub> –  $\delta$  = 7.26; <sup>13</sup>C: –  $\delta$  = 77.2), while boron chemical shifts were referenced to an external standard (<sup>11</sup>B: BF<sub>3</sub>•Et<sub>2</sub>O –  $\delta$  = 0.0).

2-aminophenyl ethanol, potassium hydroxide, benzaldehyde, sodium borohydride, 2-iodopropane, *n*-butyllithium solution 1.6 M in hexanes, *tert*-butyllithium solution 1.7 M in pentane, zinc chloride solution 1.0 M in ether, dibromomethane, silicon tetrachloride, triethylamine, sodium hydroxide, ammonium chloride, methanol, dichloromethane, hexanes (mixture of isomers), and anhydrous cyclopentyl methyl ether were purchased from Sigma Aldrich and used as received. Anhydrous sodium sulfate was purchased from EMD Millipore and used as received. Chloroform-*d* was purchased from Cambridge Isotope Laboratories and dried over 4Å molecular sieves before use. Chloriodomethane was purchased from Sigma Aldrich and distilled before use. All potassium trifluoroborates were purchased from Ambeed and used as received. Isopropylboronic acid pinacol ester was purchased from Thermo Scientific Chemicals and used as received.

### 3 | Experimental Procedures

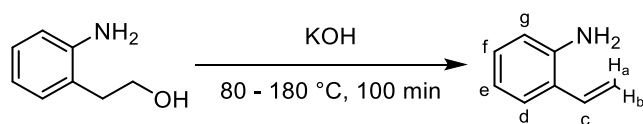

**3.1 Synthesis of 2-Vinylniline (1):** To a 50 mL round bottom flask equipped with a stir bar were added 2-aminophenylethanol (23.9 g, 0.139 mol, 1.0 equiv) and potassium hydroxide (9.76 g, 0.139 mol, 1.0 equiv) under atmospheric conditions. The flask was attached to a distillation path and placed under reduced pressure (<1 mtorr) while increasing the temperature from 80 to 180 °C in increments of 10 °C every 10 min. 2-vinylniline (**1**) was collected as a colorless clear oil between 120 and 140 °C (12.6 g, 76% yield).  $^1\text{H}$  NMR (400 MHz,  $\text{CDCl}_3$ , 298 K)  $\delta$  7.30 (d,  $J$  = 7.7 Hz, 1H,  $\text{H}_d$ ), 7.10 (t,  $J$  = 6.8 Hz, 1H,  $\text{H}_c$ ), 6.78 (td,  $J$  = 11.6, 7.3 Hz, 2H,  $\text{H}_{e,f}$ ), 6.69 (d,  $J$  = 8.0 Hz, 1H,  $\text{H}_g$ ), 5.64 (d,  $J$  = 17.4 Hz, 1H $_a$ ), 5.33 (d,  $J$  = 11.1 Hz, 1H,  $\text{H}_b$ ), 3.74 (s, 2H,  $\text{NH}_2$ ) ppm;  $^{13}\text{C}$  NMR (400 MHz,  $\text{CDCl}_3$ , 298K)  $\delta$  143.8, 132.8, 128.8, 127.4, 124.1, 119.0, 116.2, 115.7 ppm.

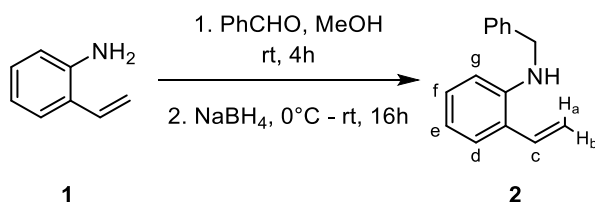

**3.2 Synthesis of (N-Benzyl)-2-Vinylniline (2):** To an oven-dried Schlenk flask equipped with a stir bar was added **1** (10.2 g, 0.086 mol, 1.0 equiv). The flask was then placed under vacuum with stirring for 20 minutes to remove dissolved air in **1**. Anhydrous methanol (342 mL, 0.25 M) was then added, though reagent-grade methanol could be used if sparged for 45 min. The flask was then brought into the glovebox, and to it was added benzaldehyde (11.4 mL, 0.112 mol, 1.3 equiv) which had been filtered through an alumina plug. The flask was then brought out of the glovebox, put on the Schlenk line, and stirred at rt for 4 hours. After 4 hours, an aliquot was taken to ensure full conversion to the imine by  $^1\text{H}$  NMR. The reaction was then cooled to 0 °C and  $\text{NaBH}_4$  (11.4 g, 0.301 mol, 3.5 equiv) was then added under positive Argon flow, after which the reaction was allowed to warm to rt and stir for 16 hours. The reaction was quenched with 180 mL 1M  $\text{NaOH}_{(\text{aq})}$ , extracted 3 times with hexanes, and concentrated under vacuum to give **2** as a yellow oil (15.8g, 89% yield).  $^1\text{H}$  NMR (400 MHz,  $\text{CDCl}_3$ , 298 K)  $\delta$  7.37 (m, 4H, Ar), 7.30 (m, 2H,  $\text{H}_{e,f}$ ), 7.16 (td,  $J$  = 7.72, 1.68 Hz, 1H,  $\text{H}_c$ ), 6.78 (m, 2H, Ar,  $\text{H}_d$ ), 6.65 (d,  $J$  = 8.2 Hz, 1H,  $\text{H}_g$ ), 5.64 (d,  $J$  = 17.3 Hz, 1H,  $\text{H}_a$ ), 5.32 (d,  $J$  = 11.1 Hz, 1H,  $\text{H}_b$ ), 4.37 (s, 2H,  $\text{NCH}_2\text{Ar}$ ), 4.18 (s, 1H,  $\text{NH}$ ) ppm;  $^{13}\text{C}$  NMR (400 MHz,  $\text{CDCl}_3$ , 298K)  $\delta$  145.2, 139.4, 133.0, 129.1, 128.8, 127.6, 127.5, 127.4, 124.4, 117.6, 116.5, 111.1, 48.4 ppm.



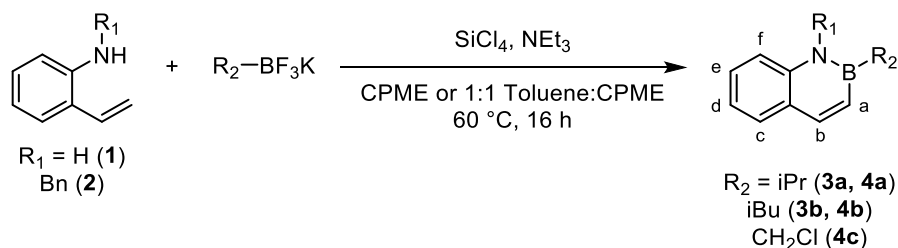

**3.3 General Procedure: Synthesis of Borazaronaphthalenes (3a-b, 4a-c):** To an oven-dried Schlenk flask equipped with a stir bar was added vinylaniline (1.5 equiv), which was then placed under vacuum to remove dissolved air in **2** until bubbling ceased. The appropriate potassium trifluoroborate (1.0 equiv) was then added under positive Argon flow, and the reaction vessel was then purged and backfilled. To this was added anhydrous cyclopentyl methyl ether (CPME) or 1:1 anhydrous toluene:anhydrous CPME (0.5 M total) to dissolve **2**. To the flask was then added  $\text{NEt}_3$  (1.5 equiv), followed by  $\text{SiCl}_4$  dropwise (1.5 equiv), taking care to avoid vigorous bubbling. The reaction then stirred for 15 min at rt, then for 16 hours at 60 °C. After 16 hours, the CPME was removed under reduced pressure to yield a brownish solid, which was resuspended in 16 mL hexanes and stirred for 2 hr. After this, 16 mL DI  $\text{H}_2\text{O}$  was added and the mixture was stirred for a further 2 hr. The mixture was then filtered to remove all undissolved solids, the layers were separated, and the organic layer was washed 3 times with sat.  $\text{NH}_4\text{Cl}_{(\text{aq})}$ . Organic layers were then combined, dried over  $\text{Na}_2\text{SO}_4$ , and concentrated under vacuum to yield the crude material, which was then purified by column chromatography in 100% hexanes.

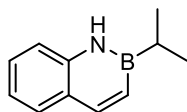

**3.3.1 Synthesis of 2-isopropylborazaronaphthalene (3a):** The title compound was synthesized according to General Procedure 3.3 on a 4.2 mmol scale using **1** and potassium trifluoro(isopropyl)borate in 1:1 toluene:CPME, and was obtained as a white crystalline solid (507.7 mg, 70% yield).  $^1\text{H}$  NMR (400 MHz,  $\text{CDCl}_3$ , 298 K)  $\delta$  7.99 (d,  $J = 11.5$  Hz, 1H,  $\text{H}_b$ ), 7.66 (s, 1H, NH), 7.60 (d,  $J = 7.8$  Hz, 1H,  $\text{H}_c$ ), 7.40 (t,  $J = 7.6$  Hz, 1H,  $\text{H}_e$ ), 7.24 (d,  $J = 3.8$  Hz, 1H,  $\text{H}_f$ ), 7.16 (t,  $J = 7.4$  Hz, 1H,  $\text{H}_d$ ), 6.88 (d,  $J = 11.5$  Hz, 1H,  $\text{H}_a$ ), 1.54 (hept,  $J = 7.2$  Hz, 1H, BCH), 1.18 (d,  $J = 7.3$  Hz, 6H,  $2\text{CH}_3$ ) ppm;  $^{11}\text{B}\{^1\text{H}\}$  (400 MHz,  $\text{CDCl}_3$ , 298 K)  $\delta$  13.8 ppm;  $^{13}\text{C}$  NMR (400 MHz,  $\text{CDCl}_3$ , 298K)  $\delta$  114.7, 140.1, 129.4, 128.1, 125.5, 120.8, 118.0, 119.9 ppm.

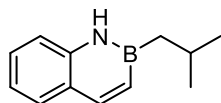

**3.3.2 Synthesis of 2-isobutylborazaronaphthalene (3b):** The title compound was synthesized according to General Procedure 3.3 on a 1.4 mmol scale, using **1** and potassium trifluoro(isobutyl)borate in 1:1 toluene:CPME, and was obtained as a white solid (222.0 mg, 86% yield).  $^1\text{H}$  NMR (400 MHz,  $\text{CDCl}_3$ , 298 K)  $\delta$  7.94 (d,  $J = 11.5$  Hz, 2H), 7.65 (s, 1H, NH), 7.59 (d,  $J = 7.7$  Hz, 1H,  $\text{H}_c$ ), 7.38 (td,  $J = 7.1, 1.6$  Hz, 1H,  $\text{H}_e$ ), 7.21 (d,  $J = 7.5$  Hz, 1H,  $\text{H}_f$ ), 7.14 (td,  $J = 7.0, 1.2$  Hz, 1H,  $\text{H}_d$ ), 6.83 (dd,  $J = 11.5, 2.0$  Hz, 1H,  $\text{H}_a$ ), 2.17 – 1.96 (m, 1H,  $\text{BCH}_2\text{CH}$ ), 1.21 (d,  $J = 7.2$  Hz, 2H,  $\text{BCH}_2\text{CH}$ ), 0.99 (d,  $J = 6.6$  Hz, 6H,  $2\text{CH}_3$ ) ppm;  $^{11}\text{B}\{^1\text{H}\}$  (400 MHz,  $\text{CDCl}_3$ , 298 K)  $\delta$  38.0 ppm;  $^{13}\text{C}$  NMR (400 MHz,  $\text{CDCl}_3$ , 298K) 144.1, 140.3, 129.4, 128.0, 125.4, 120.7, 117.9, 26.4, 25.8 ppm; HRMS (EI)  $m/z$  calculated for  $\text{C}_{12}\text{H}_{16}\text{BN}$   $[\text{M}]^+$  185.1376, found 185.0380.

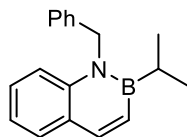

**3.3.3 Synthesis of (N-benzyl)-2-isopropylborazonaphthalene (4a):** The title compound was synthesized according to General Procedure 3.3 on a 2.5 mmol scale, using **2** and potassium trifluoro(isopropyl)borate in CPME, and was obtained as a white crystalline solid (228.0 mg, 35% yield).  $^1\text{H}$  NMR (400 MHz,  $\text{CDCl}_3$ , 298 K)  $\delta$  8.02 (d,  $J$  = 11.5 Hz, 1H,  $\text{H}_b$ ), 7.62 (d,  $J$  = 8.6 Hz, 1H,  $\text{H}_f$ ), 7.29 (m, 4H, Ar), 7.21 (m, 1H, Ar), 7.12 (m, 3H,  $\text{H}_{c,d,e}$ ), 6.99 (d,  $J$  = 11.5 Hz, 1H,  $\text{H}_a$ ), 5.37 (s, 2H,  $\text{NCH}_2\text{Ar}$ ), 1.63 (hept,  $J$  = 7.1 Hz, 1H, CH), 1.13 (d,  $J$  = 7.1 Hz, 6H,  $2\text{CH}_3$ ) ppm;  $^{11}\text{B}\{^1\text{H}\}$  (400 MHz,  $\text{CDCl}_3$ , 298 K)  $\delta$  40.4 ppm;  $^{13}\text{C}$  NMR (400 MHz,  $\text{CDCl}_3$ , 298K)  $\delta$  145.3, 141.5, 139.0, 130.2, 128.8, 128.4, 1267.0, 125.9, 120.6, 116.5, 50.4, 20.8 ppm. Anal. calcd for  $\text{C}_{18}\text{H}_{20}\text{BN}$ : C, 82.78; H, 7.72; N, 5.36%. Found: C, 81.35; H, 7.51; N, 5.38%.

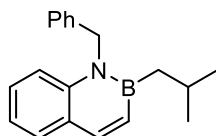

**3.3.4 Synthesis of (N-benzyl)-2-isobutylborazonaphthalene (4b):** The title was synthesized according to General Procedure 3.3 on a 1.67 mmol scale, using **2** and potassium trifluoro(isobutyl)borate in CPME, and was obtained as a white solid (85.0 mg, 19% yield).  $^1\text{H}$  NMR (400 MHz,  $\text{CDCl}_3$ , 298 K)  $\delta$  7.99 (d,  $J$  = 11.4 Hz, 1H,  $\text{H}_b$ ), 7.63 (d,  $J$  = 7.7 Hz, 1H,  $\text{H}_f$ ), 7.27 (m, 5H, Ar), 7.13 (m, 3H,  $\text{H}_{c,d,e}$ ), 6.98 (d,  $J$  = 11.5 Hz, 1H,  $\text{H}_a$ ), 5.34 (s, 2H,  $\text{NCH}_2\text{Ar}$ ), 2.17 (m, 6.6 Hz, 1H,  $\text{BCH}_2\text{CH}$ ), 1.29 (d,  $J$  = 7.2 Hz, 2H,  $\text{BCH}_2\text{CH}$ ), 0.99 (d,  $J$  = 6.5 Hz, 6H,  $2\text{CH}_3$ ) ppm;  $^{11}\text{B}\{^1\text{H}\}$  (400 MHz,  $\text{CDCl}_3$ , 298 K)  $\delta$  39.8 ppm;  $^{13}\text{C}$  NMR (400 MHz,  $\text{CDCl}_3$ , 298K)  $\delta$  144.3, 141.8, 138.8, 130.2, 128.8, 128.3, 127.0, 125.9, 116.2, 50.7, 26.5, 25.8 ppm; HRMS (EI)  $m/z$  calculated for  $\text{C}_{19}\text{H}_{22}\text{BN}$   $[\text{M}]^+$  275.1845, found 275.1845.

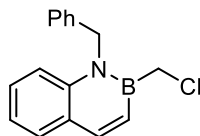

**3.3.5 Synthesis of (N-benzyl)-2-(chloromethyl)borazonaphthalene (4c):** The title compound was synthesized according to General Procedure 3.3 on a 7.5 mmol scale, using **2** and potassium trifluoro(chloromethyl)borate in CPME and was obtained as a white crystalline solid (810.9 mg, 43% yield).  $^1\text{H}$  NMR (400 MHz,  $\text{CDCl}_3$ , 298 K)  $\delta$  8.14 (d,  $J$  = 11.4 Hz, 1H,  $\text{H}_b$ ), 7.70 (d,  $J$  = 7.0 Hz, 1H,  $\text{H}_f$ ), 7.41 (m, 2H, Ar and  $\text{H}_c$ ), 7.26 (m, 4H, Ar), 7.17 (d,  $J$  = 11.4 Hz, 2H,  $\text{H}_{d,e}$ ), 7.10 (d,  $J$  = 6.8 Hz, 1H,  $\text{H}_d$ ), 5.33 (s, 2H,  $\text{NCH}_2\text{Ar}$ ), 3.57 (s, 2H,  $\text{BCH}_2\text{Br}$ ) ppm;  $^{11}\text{B}\{^1\text{H}\}$  (400 MHz,  $\text{CDCl}_3$ , 298 K)  $\delta$  35.8 ppm;  $^{13}\text{C}$  NMR (400 MHz,  $\text{CDCl}_3$ , 298K)  $\delta$  146.5, 141.1, 137.8, 130.6, 129.0, 127.3, 127.2, 125.8, 121.4, 116.3, 50.8 ppm; HRMS (EI)  $m/z$  calculated for  $\text{C}_{16}\text{H}_{15}\text{ClBN}$   $[\text{M}]^+$  267.0986 ( $\text{Cl}^{35}$ ), found 267.0981, and 269.0957 ( $\text{Cl}^{37}$ ), found 269.0966.

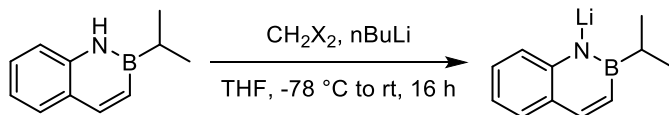

**3.4 Deprotonation of Compound 3a Under Matteson Homologation Conditions:** To an oven-dried 10 mL Schlenk flask equipped with a stir bar was added **3a** (80.0 mg, 0.468 mmol, 1.0 equiv), and THF (0.78 mL, 0.6 M) in the glovebox. If using chloriodomethane as the dihalomethane (47.8  $\mu\text{L}$ , 0.655 mmol, 1.4 equiv), it was also added in the glovebox. The flask was then sealed, brought out of the glovebox, put on the Schlenk line, and cooled to  $-78\text{ }^\circ\text{C}$  using a dry ice/isopropanol bath. If using dibromomethane as the

dihalomethane, it was then added via syringe (85.0  $\mu\text{L}$ , 1.218 mmol, 2.5 equiv). After 15 minutes of stirring at  $-78\text{ }^{\circ}\text{C}$ ,  $n\text{BuLi}$  (1.1 equiv for  $\text{ClCH}_2\text{I}$  or 2.0 equiv for  $\text{CH}_2\text{Br}_2$ ) was added dropwise over 45 min using a syringe pump, taking care that the solution should cool before reaching the solution by flowing down the inside of the flask, which was held at an angle in the bath (**Figure S10**). Following addition, the reaction was stirred for 16 hours while slowly warming up to rt. The reaction was then quenched with methanol, opened to air, and concentrated under vacuum. The resulting viscous oil was redissolved in minimal DCM, washed 3 times with sat.  $\text{NH}_4\text{Cl}_{(\text{aq})}$ , dried over  $\text{Na}_2\text{SO}_4$ , and concentrated under vacuum to yield the crude mixture as an oily yellow solid. Conversion was then estimated by  $^1\text{H}$  NMR (**Figure S1**,  $\text{CH}_2\text{Br}_2$  40%,  $\text{ClCH}_2\text{I}$  44%).

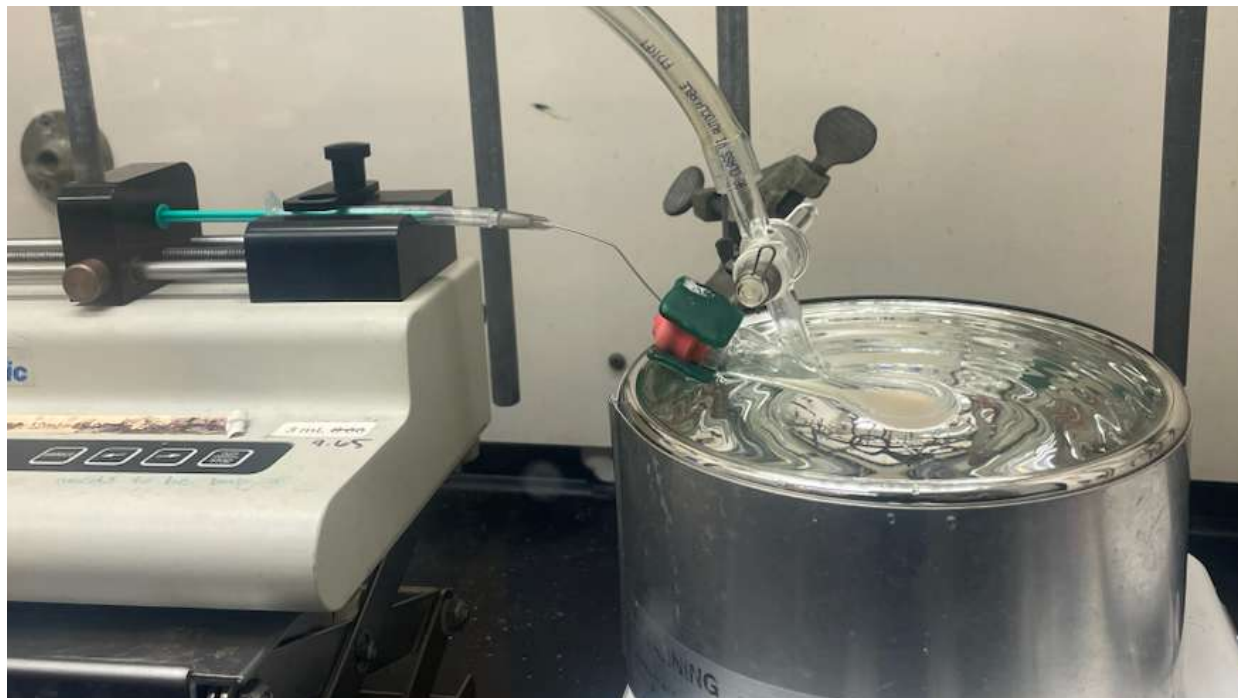

**Figure S10.** Photograph displaying a mock-up experimental setup for dropwise addition from a syringe pump of a butyllithium reagent down the side of the 10 mL Schlenk flask vessel to pre-cool it, as used in Experimental Procedures 3.4-9.

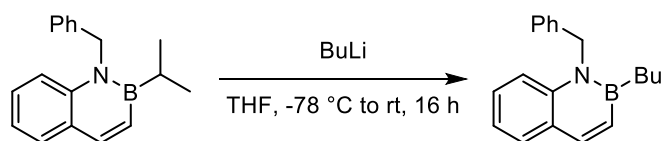

**3.5 Substitution of Compound 4a with Butyllithium:** To an oven-dried 10 mL Schlenk flask was added **4a** (150 mg, 0.574 mmol, 1.0 equiv) in the glovebox and dissolved in THF (0.975 mL, 0.6 M). The flask was then sealed, brought out of the glovebox, put on the Schlenk line, and cooled to  $-78\text{ }^{\circ}\text{C}$  using a dry ice/isopropanol bath. After 15 minutes of stirring at  $-78\text{ }^{\circ}\text{C}$ ,  $\text{BuLi}$  (1.0 or 2.5 equiv) was added dropwise over 45 min using a syringe pump, taking care that the reagent should cool before reaching the solution by flowing down the inside of the flask, which was held at an angle in the bath (**Figure S10**). Following addition, the reaction was stirred for 16 hours while slowly warming up to rt. The reaction was then quenched with methanol, opened to air, and then concentrated under vacuum. The resulting viscous oil was redissolved

in minimal DCM, washed 3 times with saturated  $\text{NH}_4\text{Cl}_{(\text{aq})}$ , dried over  $\text{Na}_2\text{SO}_4$ , and concentrated under vacuum to yield the crude as a brown oil. Conversion was then estimated by  $^1\text{H}$  NMR (**Figure S2-4**).

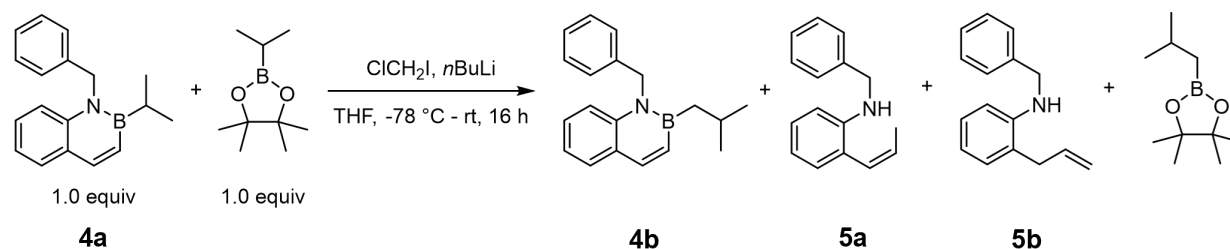

**3.6 Matteson Homologation of iPrBpin in the Presence of Compound 4a:** To an oven-dried 10 mL Schlenk flask equipped with a stir bar was added **4a** (145 mg, 0.554 mmol, 1.0 equiv), chloriodomethane (266  $\mu\text{L}$ , 1.66 mmol, 3.0 equiv), and THF (0.780 mL, 0.6 M) in the glovebox. The flask was then sealed, brought out of the glovebox and put on the Schlenk line. To it was added isopropylboronic acid pinacol ester (104  $\mu\text{L}$ , 0.554 mmol, 1.0 equiv). The reaction was then cooled to  $-78$   $^\circ\text{C}$  using a dry ice/isopropanol bath. After 15 minutes of stirring at  $-78$   $^\circ\text{C}$ ,  $n\text{BuLi}$  (865  $\mu\text{L}$ , 1.384 mmol, 2.5 equiv) was added dropwise over 45 min using a syringe pump, taking care that the reagent should cool before reaching the solution by flowing down the inside of the flask, which was held at an angle in the bath (**Figure S10**). Following addition, the reaction was stirred for 16 hours while slowly warming up to rt. The reaction was then quenched with methanol, opened to air, and then concentrated under vacuum. The resulting viscous oil was redissolved in minimal DCM, washed 3 times with saturated  $\text{NH}_4\text{Cl}_{(\text{aq})}$ , dried over  $\text{Na}_2\text{SO}_4$ , and concentrated under vacuum to yield the crude mixture as an oily brown solid. Conversion (iPrBpin to iBuBpin; **4a** to **4b/5a/5b**) was then estimated by  $^1\text{H}$  NMR (**Figure S6**).

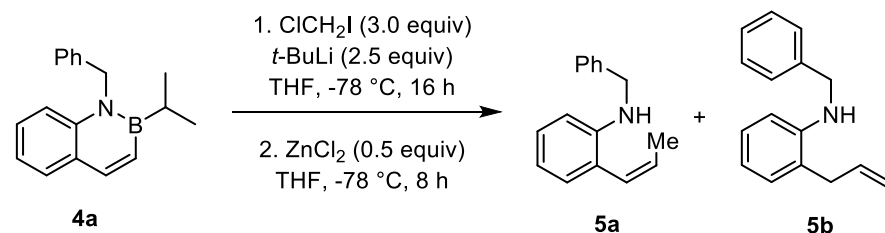

**3.7 Ring-Expansion of Compound 4a:** To an oven-dried 10 mL Schlenk flask equipped with a stir bar was added **4a** (90.0 mg, 0.345 mmol, 1.0 equiv), and THF (0.780 mL, 0.6 M) in the glovebox. If using chloriodomethane as the dihalomethane (62.8  $\mu\text{L}$ , 0.861 mmol, 2.5 equiv), it was also added in the glovebox. The flask was then sealed, brought out of the glovebox, put on the Schlenk line, and cooled to  $-78$   $^\circ\text{C}$  in a bath of isopropanol maintained by an immersion cooler. If using dibromomethane (60.1  $\mu\text{L}$ , 0.861 mmol, 2.5 equiv), it was then added via syringe. After 15 minutes of stirring at  $-78$   $^\circ\text{C}$ ,  $t\text{BuLi}$  (405  $\mu\text{L}$ , 0.689 mmol, 2.0 equiv) was added dropwise over 45 min using a syringe pump, taking care that the reagent should cool before reaching the solution by flowing down the inside of the flask, which was held at an angle in the bath (**Figure S10**). Following addition, the reaction was stirred for 16 hours at  $-78$   $^\circ\text{C}$ , after which 1.0 M  $\text{ZnCl}_2$  in  $\text{Et}_2\text{O}$  (173.0  $\mu\text{L}$ , 0.173 mmol, 0.5 equiv) was added via rapid dropwise addition down the side of the flask, and the reaction was stirred for an additional 8 hours at  $-78$   $^\circ\text{C}$ . The reaction was then quenched with dropwise addition of methanol and the immersion cooler was turned off, allowing the reaction to gradually warm up to room temperature overnight. The next day, the reaction was concentrated under vacuum. The resulting viscous oil was redissolved in minimal DCM, washed 3 times with saturated  $\text{NH}_4\text{Cl}_{(\text{aq})}$ , dried over  $\text{Na}_2\text{SO}_4$ , and concentrated under vacuum to yield the crude mixture as an oily brown solid. Conversion to **5** was estimated from the crude mixture by  $^1\text{H}$  NMR. Pure **5a** and **5b** were isolated for structural validation via preparatory thin layer chromatography in hexanes.

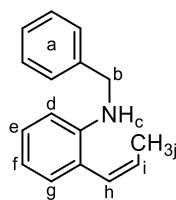

**3.7.1 (Z)-N-benzyl-2-(prop-1-en-1-yl)aniline (5a):** Obtained as a light brown oil.  $^1\text{H}$  NMR (400 MHz,  $\text{CDCl}_3$ , 298 K)  $\delta$  7.35 (m, 4H<sub>a</sub>), 7.28 (m, 1H<sub>a</sub>), 7.13 (td,  $J$  = 7.7, 1.7 Hz, 1H<sub>e</sub>), 7.07 (dt,  $J$  = 7.4, 1.2 Hz, 1H<sub>g</sub>), 6.71 (td,  $J$  = 7.4 Hz, 1H<sub>f</sub>), 6.64 (dt,  $J$  = 8.1 Hz, 1H<sub>d</sub>), 6.30 (d,  $J$  = 11.2 Hz, 1H<sub>h</sub>), 5.88 (dq,  $J$  = 11.2, 6.9 Hz, 1H<sub>i</sub>), 4.36 (s, 2H<sub>b</sub>), 4.17 (s(broad), 1H<sub>c</sub>), 1.74 (dd,  $J$  = 6.9, 1.8 Hz, 3H<sub>j</sub>);  $^{11}\text{B}\{^1\text{H}\}$  (400 MHz,  $\text{CDCl}_3$ , 298 K) No peaks observed;  $^{13}\text{C}$  NMR (400 MHz,  $\text{CDCl}_3$ , 298K)  $\delta$  129.7, 129.5, 128.8, 128.2, 127.5, 127.3, 126.0, 116.8, 110.4, 48.3, 14.7 ppm; HRMS (EI)  $m/z$  calculated for  $\text{C}_{16}\text{H}_{17}\text{N}$   $[\text{M}]^+$  223.1361, found 223.1365.

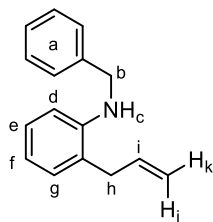

**3.7.2 2-allyl-N-benzylaniline (5b):** Obtained as a light brown oil.  $^1\text{H}$  NMR (400 MHz,  $\text{CDCl}_3$ , 298 K)  $\delta$  7.35 (m, 4H<sub>a</sub>), 7.28 (m, 1H<sub>a</sub>), 7.13 (td,  $J$  = 7.6, 1.7 Hz, 1H<sub>e</sub>), 7.07 (d,  $J$  = 7.2 Hz, 1H<sub>g</sub>), 6.72 (td,  $J$  = 7.4, 1.3 Hz, 1H<sub>f</sub>), 6.64 (d,  $J$  = 8.0 Hz, 1H<sub>d</sub>), 5.97 (ddt,  $J$  = 16.4, 10.2, 6.2 Hz, 1H<sub>i</sub>), 5.12 (dd,  $J$  = 11.4, 1.7 Hz, 1H<sub>j</sub>), 5.08 (dd,  $J$  = 17.0, 1.7 Hz, 1H<sub>k</sub>), 4.36 (s, 2H<sub>b</sub>), 4.15 (s(broad), 1H<sub>c</sub>), 3.33 (d,  $J$  = 9.8 Hz, 2H<sub>h</sub>) ppm;  $^{11}\text{B}\{^1\text{H}\}$  (400 MHz,  $\text{CDCl}_3$ , 298 K) No peaks observed;  $^{13}\text{C}$  NMR (400 MHz,  $\text{CDCl}_3$ , 298K)  $\delta$  136.1, 130.0, 128.8, 127.9, 127.6, 127.3, 117.6, 116.5, 48.4, 36.7 ppm; HRMS (EI)  $m/z$  calculated for  $\text{C}_{16}\text{H}_{17}\text{N}$   $[\text{M}]^+$  223.1361, found 223.1367.

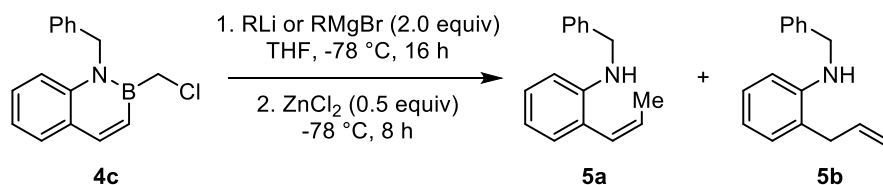

**3.8 Ring-Expansion of 4c:** To an oven-dried 10 mL Schlenk flask was added **4c** (100.0 mg, 0.374 mmol, 1.0 equiv) in the glovebox and dissolved in THF (0.623 mL, 0.6 M). The flask was then sealed, brought out of the glovebox, put on the Schlenk line, and cooled to  $-78\text{ }^\circ\text{C}$  in a bath of isopropanol maintained by an immersion cooler. After 15 minutes of stirring at  $-78\text{ }^\circ\text{C}$ , the alkyl organometallic reagent (2.0 equiv) was added dropwise over 45 min using a syringe pump, taking care that the reagent should cool before reaching the solution by flowing down the inside of the flask, which was held at an angle in the bath (**Figure S10**). Following addition, the reaction was stirred for 16 hours at  $-78\text{ }^\circ\text{C}$ , after which 1.0 M  $\text{ZnCl}_2$  in  $\text{Et}_2\text{O}$  (187  $\mu\text{L}$ , 0.187 mmol, 0.5 equiv) was added via rapid dropwise addition down the side of the flask, and the reaction was stirred for an additional 8 hours at  $-78\text{ }^\circ\text{C}$ . The reaction was then quenched with dropwise addition of methanol and the immersion cooler was turned off, allowing the reaction to gradually warm up to room temperature overnight. The next day, the reaction was concentrated under vacuum. The resulting viscous oil was redissolved in minimal DCM, washed 3 times with saturated  $\text{NH}_4\text{Cl}_{(\text{aq})}$ , dried over  $\text{Na}_2\text{SO}_4$ , and concentrated under vacuum to yield the crude mixture as a brown goo. Conversion to **5a** and **5b** was estimated by  $^1\text{H}$  NMR.

#### 4 | NMR Spectroscopy ( $^1\text{H}$ , $^{11}\text{B}$ , $^{13}\text{C}$ ):

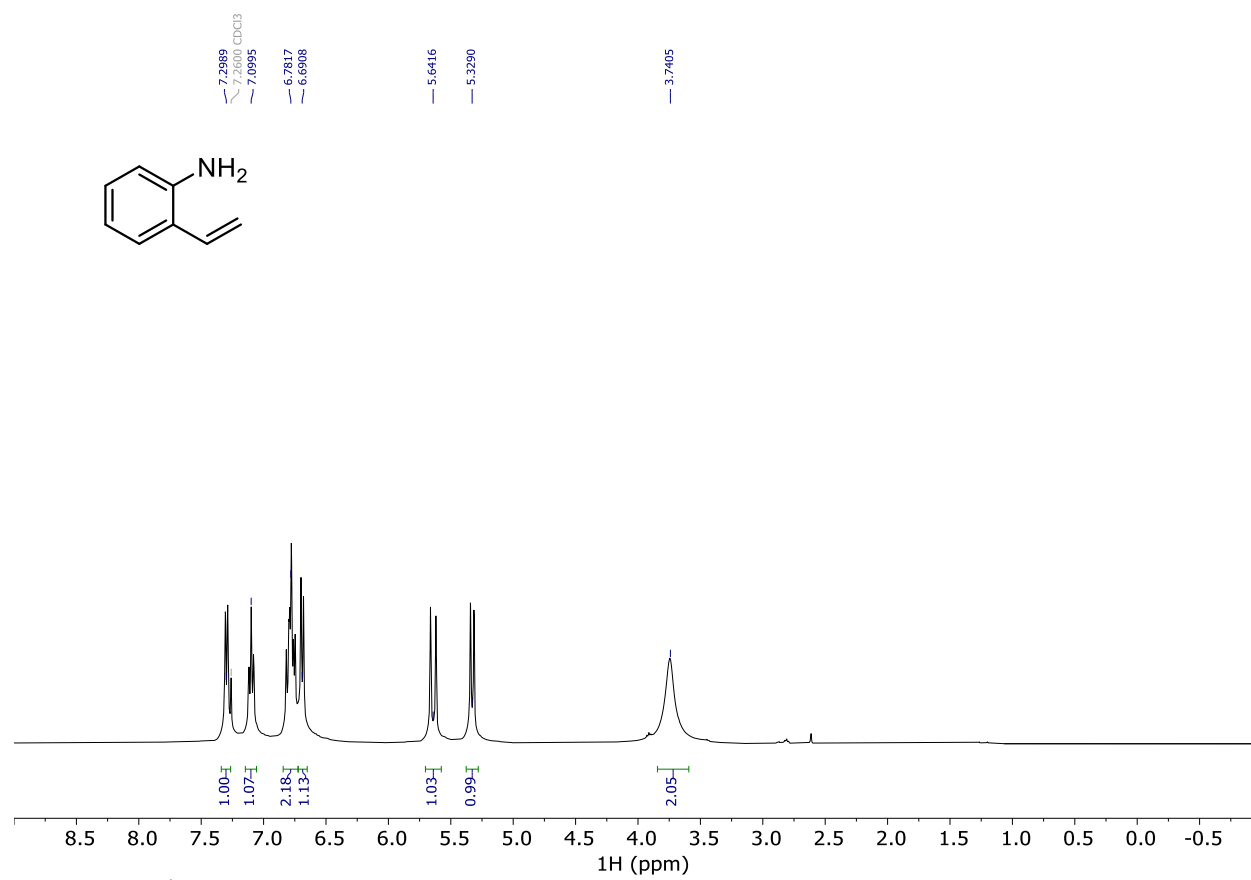

**Figure S11.**  $^1\text{H}$  NMR spectrum of 2-Vinylaniline (**1**) in  $\text{CDCl}_3$ .

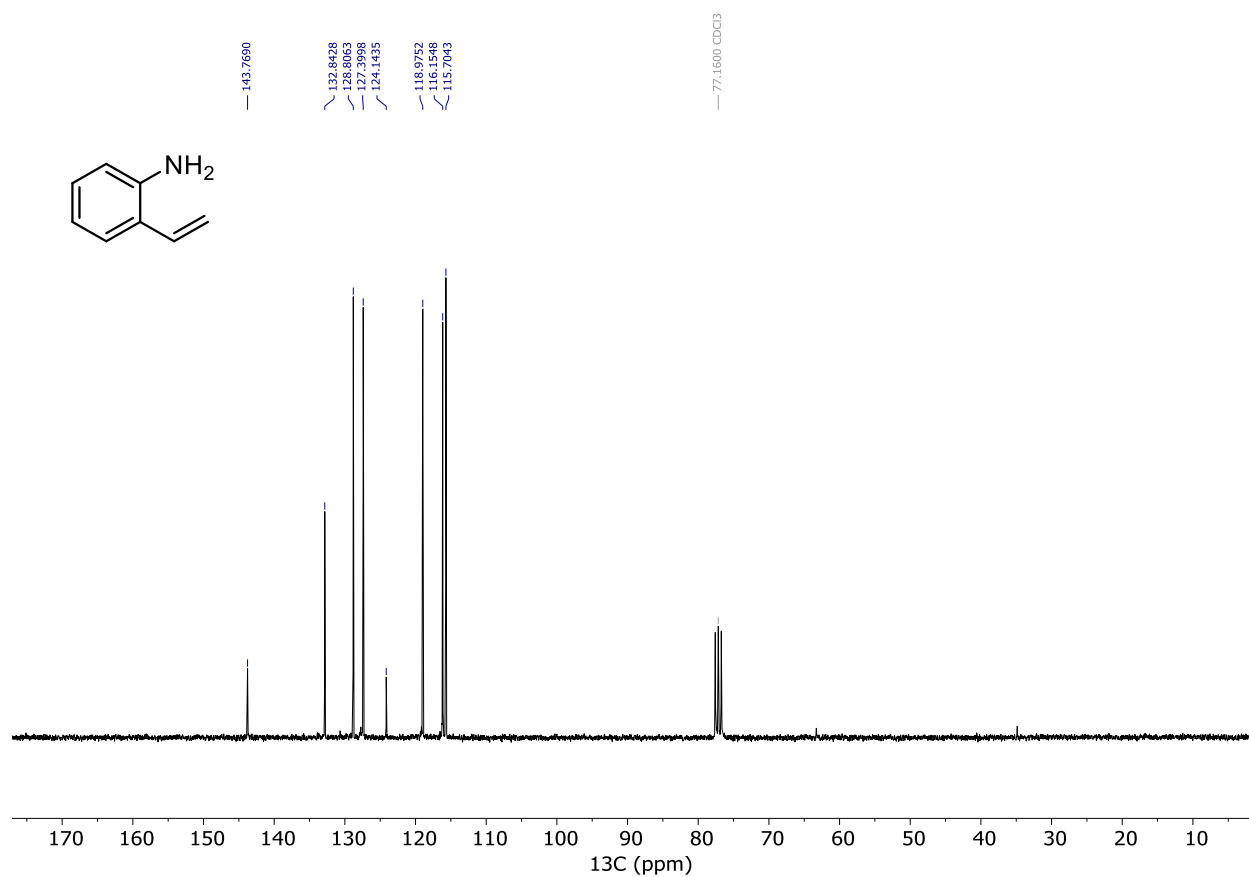

**Figure S12.** <sup>13</sup>C NMR spectrum of 2-Vinylaniline (**1**) in CDCl<sub>3</sub>.

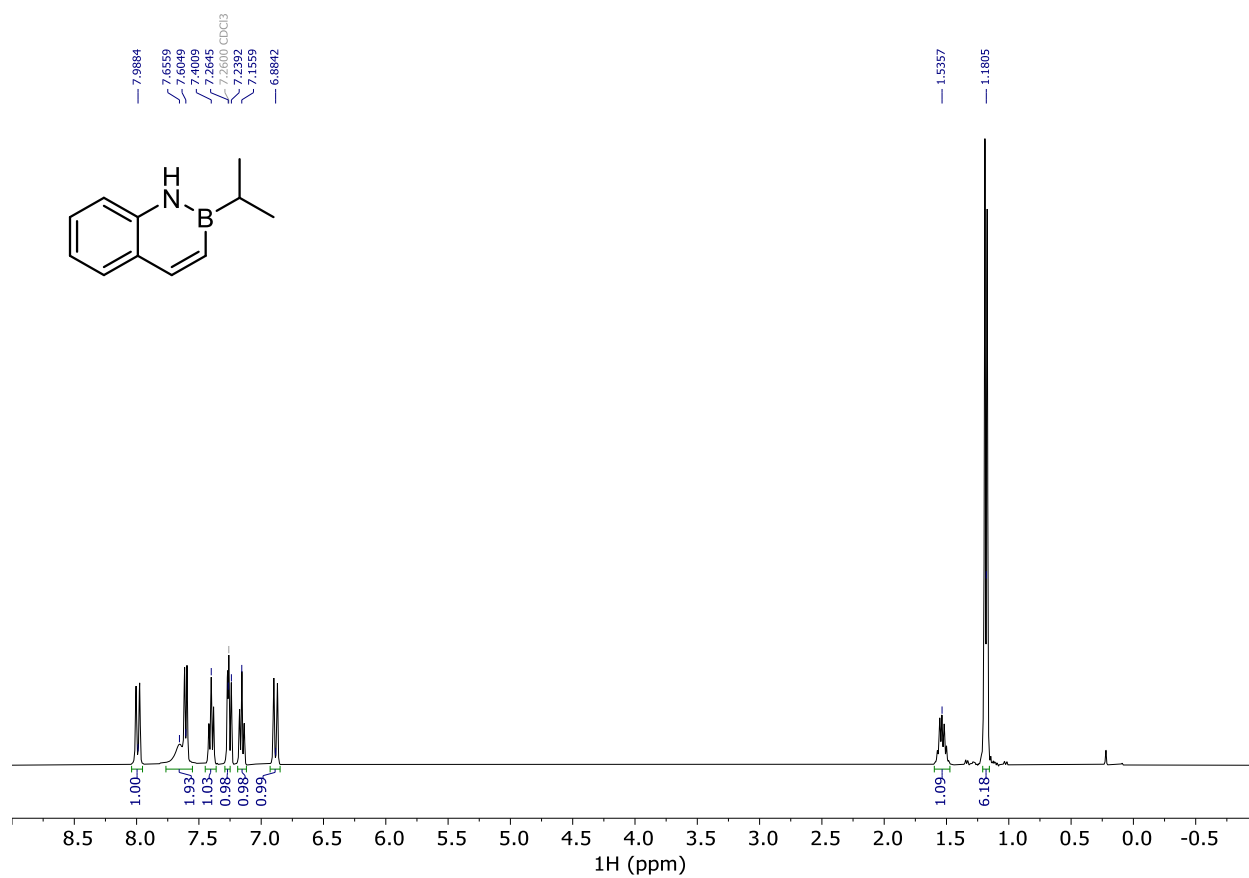

**Figure S13.** <sup>1</sup>H NMR Spectrum of 2-isopropylborazonaphthalene (**3a**) in CDCl<sub>3</sub>.



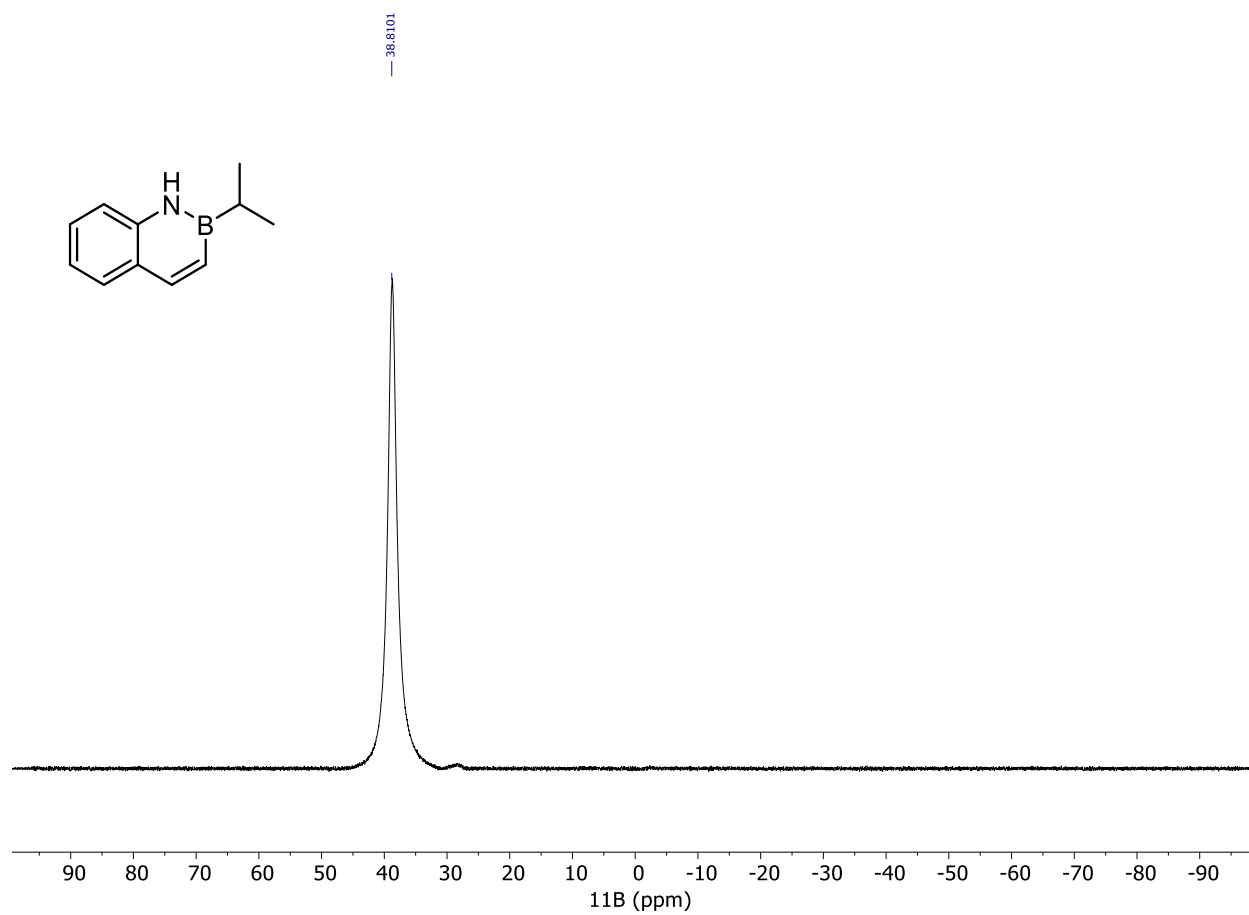

**Figure S14.**  $^{11}\text{B}$  NMR Spectrum of 2-isopropylborazonaphthalene (**3a**) in  $\text{CDCl}_3$ .

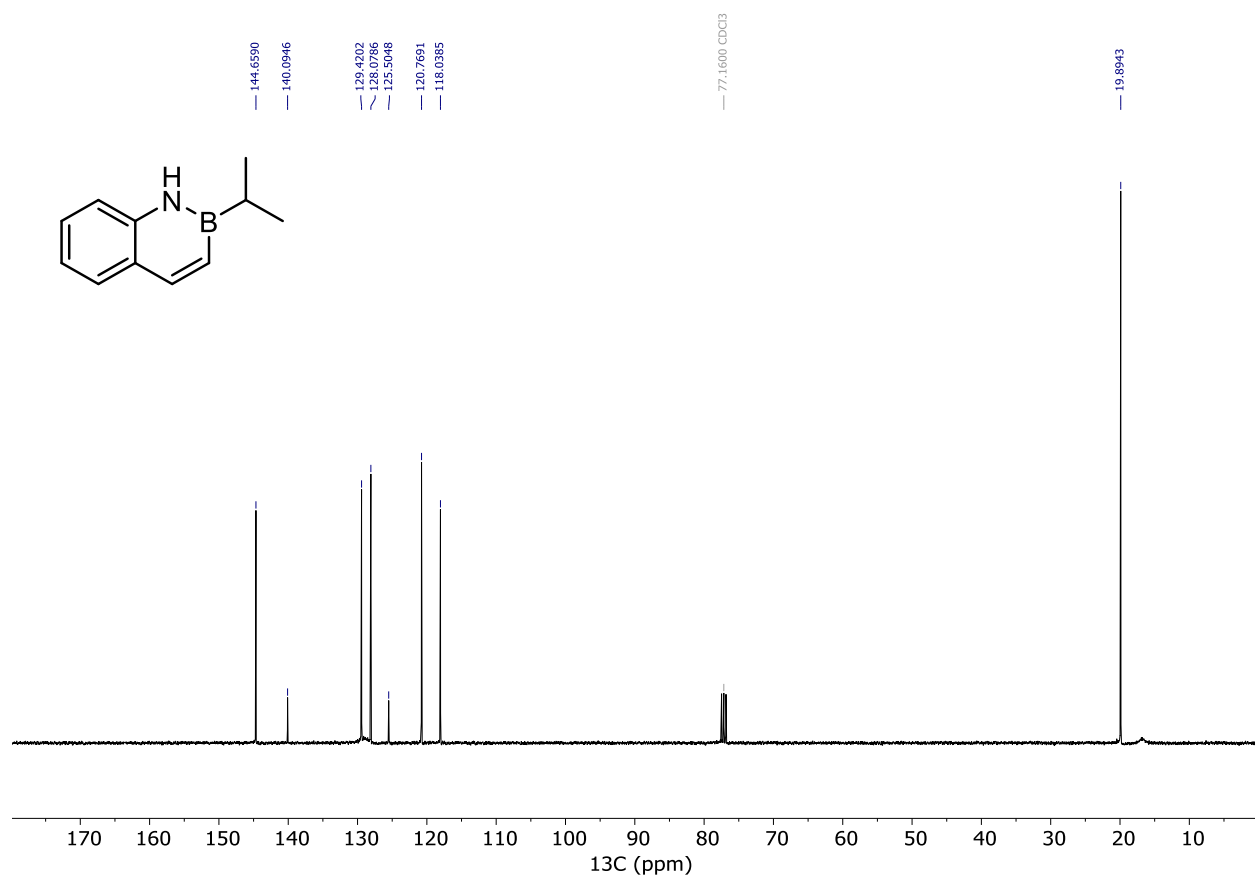

**Figure S15.** <sup>13</sup>C NMR Spectrum of 2-isopropylborazonaphthalene (**3a**) in CDCl<sub>3</sub>.

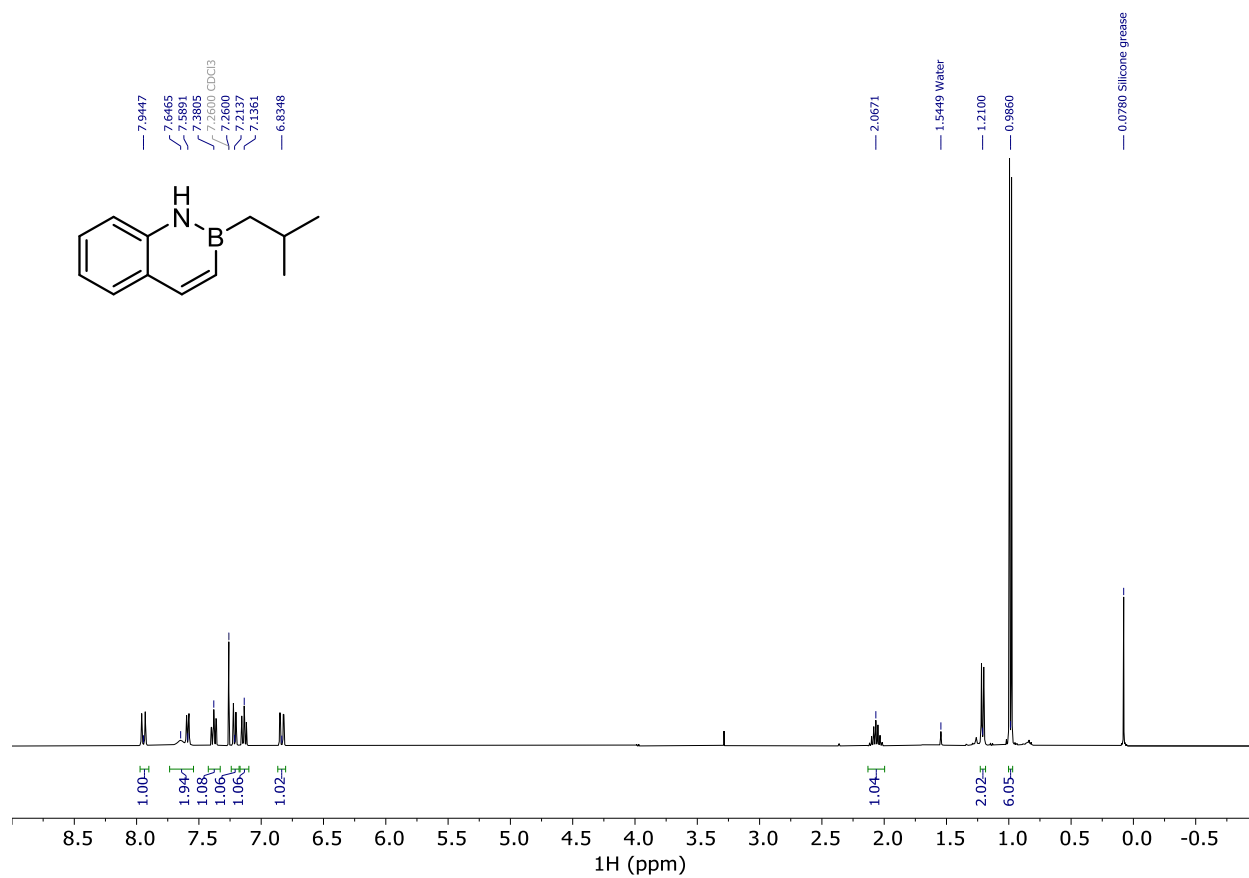

**Figure S16.** <sup>1</sup>H NMR Spectrum of 2-isobutylborazonaphthalene (**3b**) in CDCl<sub>3</sub>.

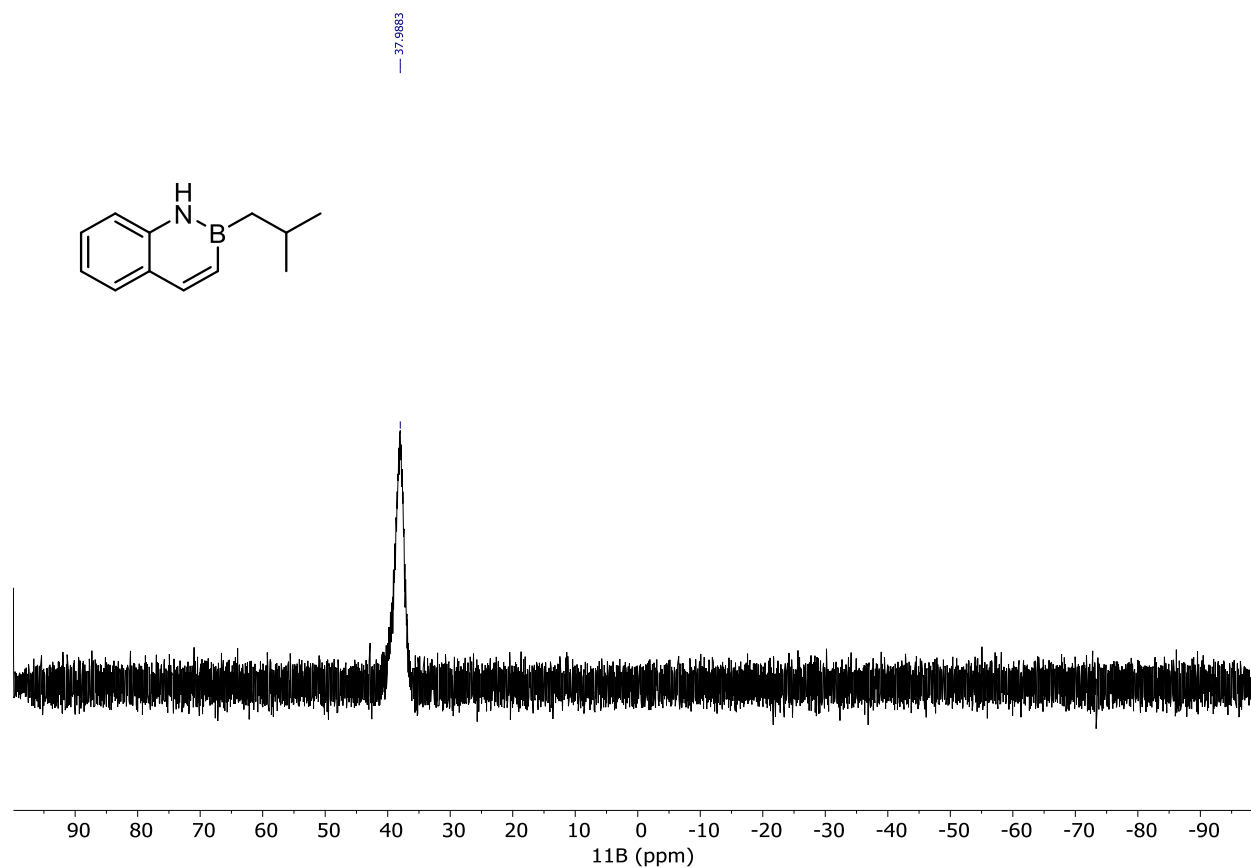

**Figure S17.**  $^{11}\text{B}$  NMR Spectrum of 2-isobutylborazonaphthalene (**3b**) in  $\text{CDCl}_3$

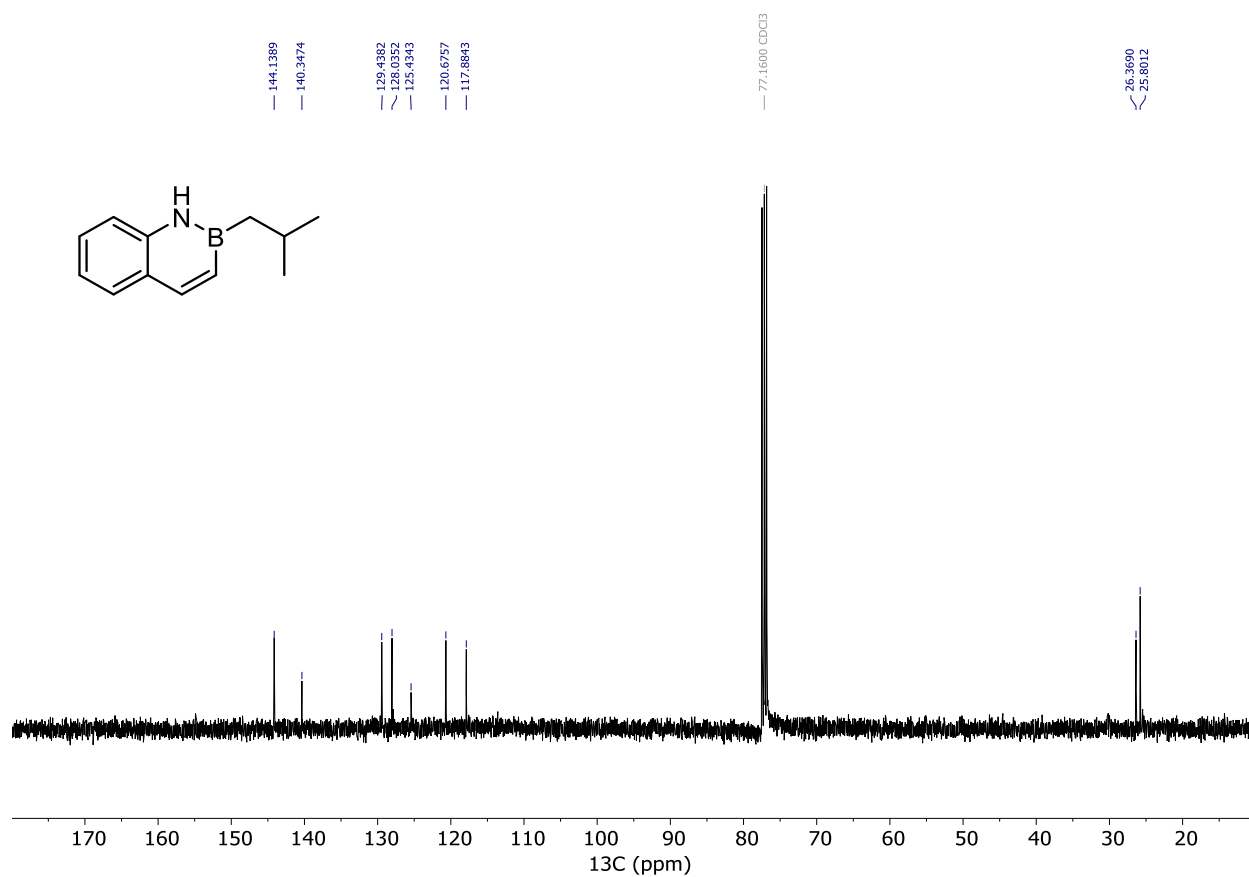

**Figure S18.** <sup>13</sup>C NMR Spectrum of 2-isobutylborazonaphthalene (**3b**) in CDCl<sub>3</sub>.

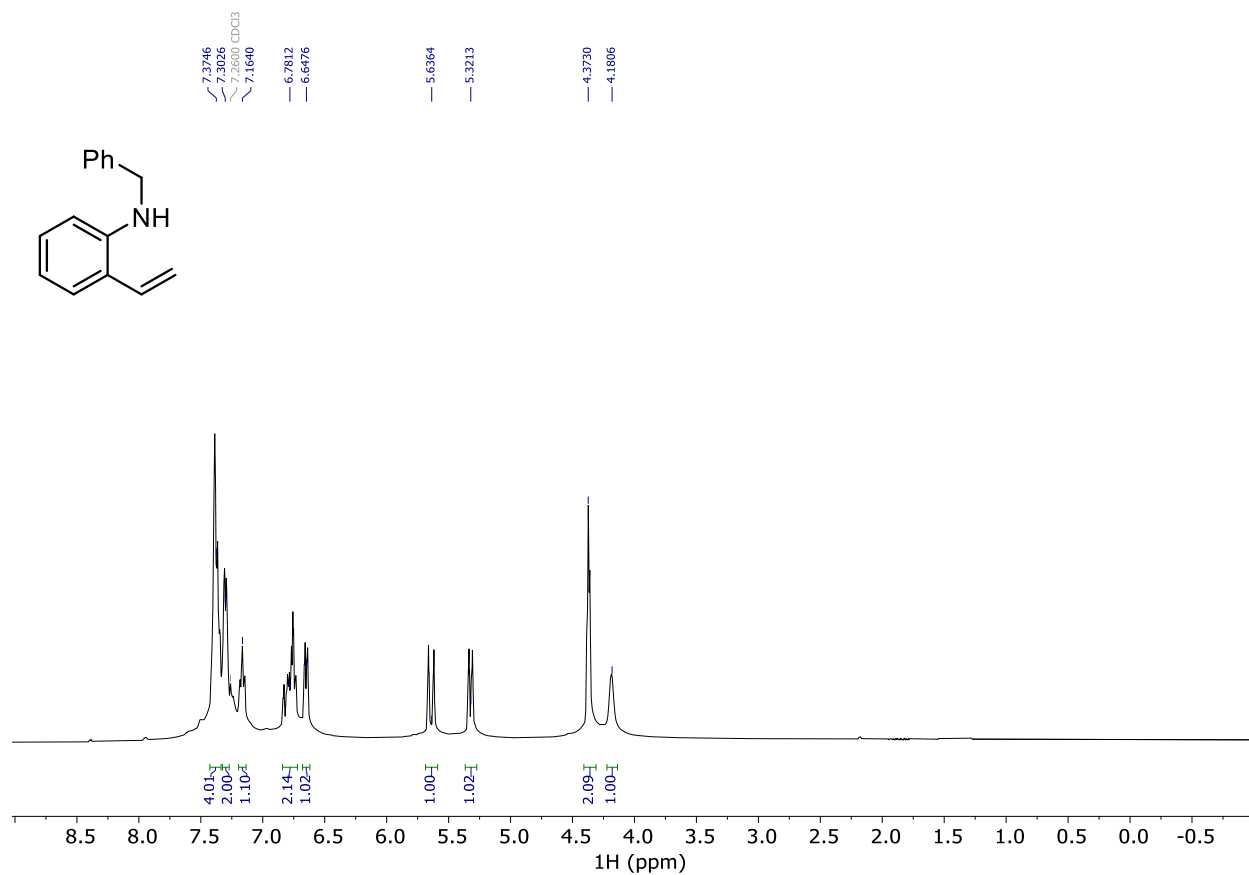

**Figure S19.** <sup>1</sup>H NMR spectrum of (N-Benzyl)-2-Vinylaniline (**2**) in CDCl<sub>3</sub>.

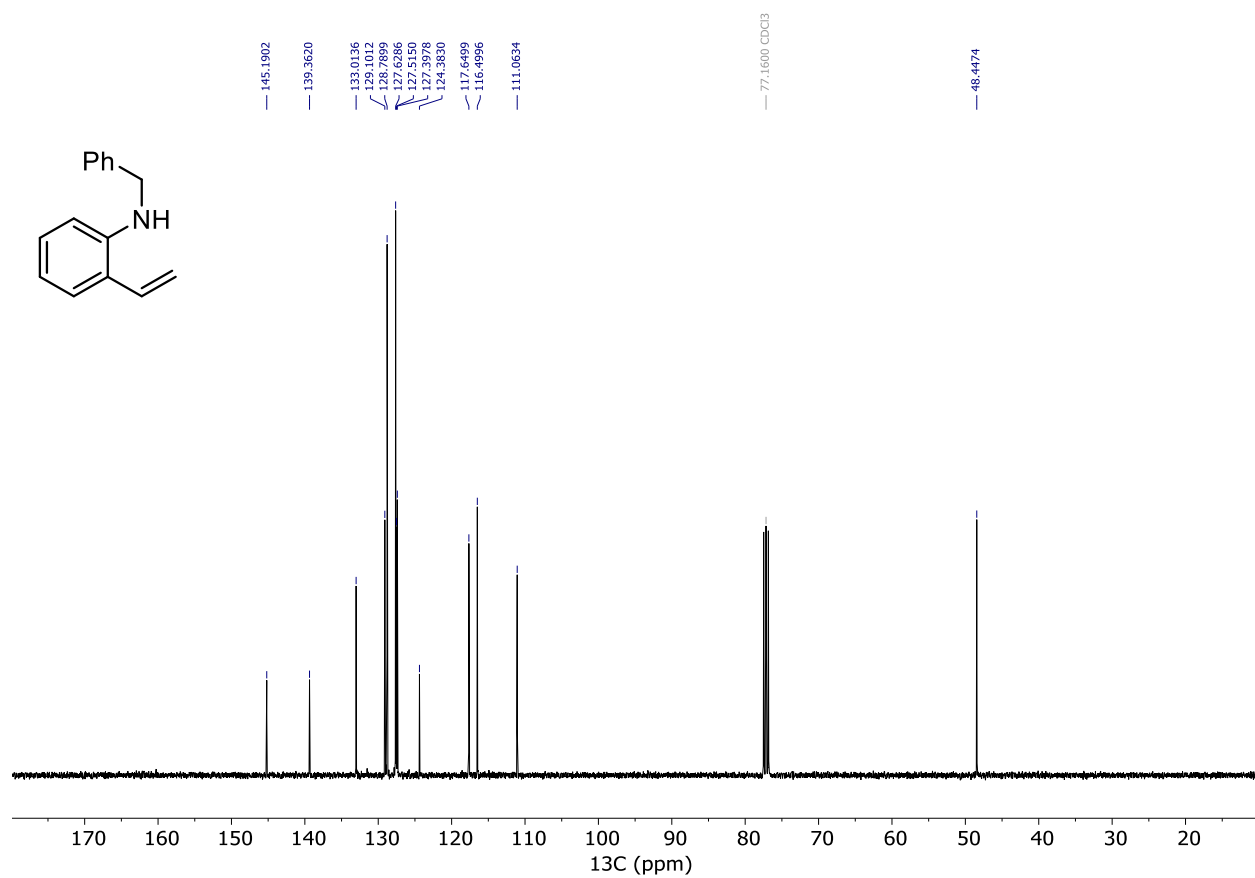

**Figure S20.** <sup>13</sup>C NMR spectrum of (N-Benzyl)-2-Vinylniline (**2**) in CDCl<sub>3</sub>.

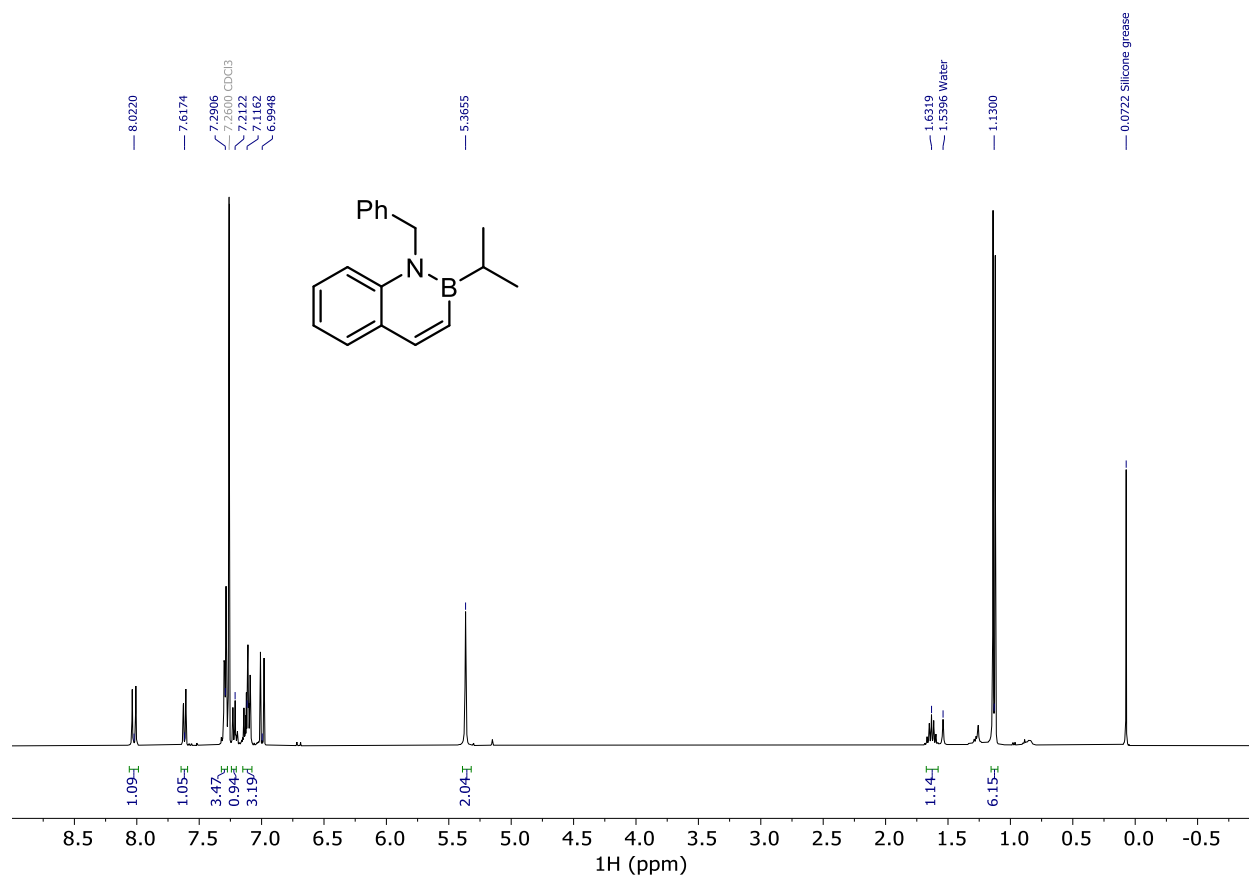

**Figure S21.** <sup>1</sup>H NMR Spectrum of (N-benzyl)-2-isopropylborazonaphthalene (**4a**) in CDCl<sub>3</sub>.



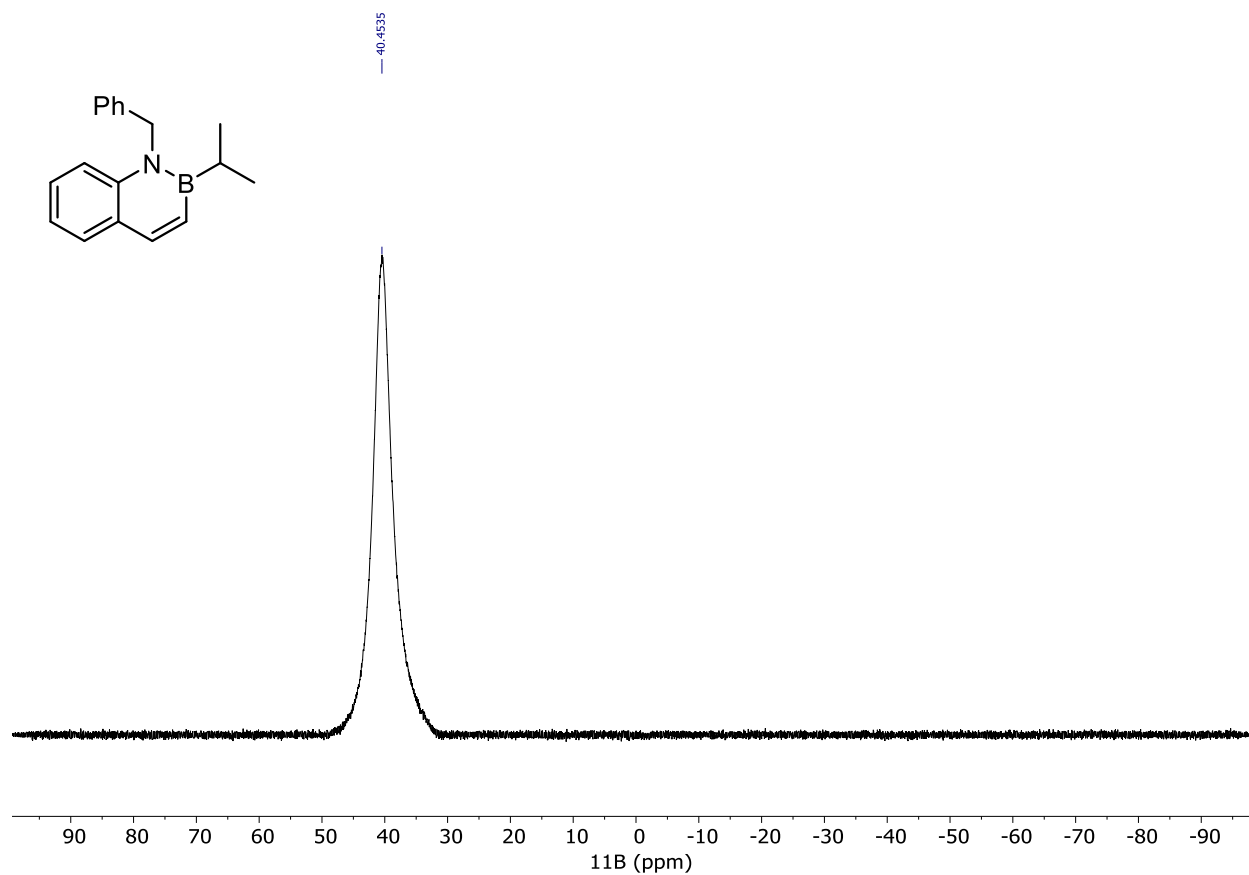

**Figure S22.**  $^{11}\text{B}$  NMR Spectrum of (N-benzyl)-2-isopropylborazonaphthalene (**4a**) in  $\text{CDCl}_3$ .

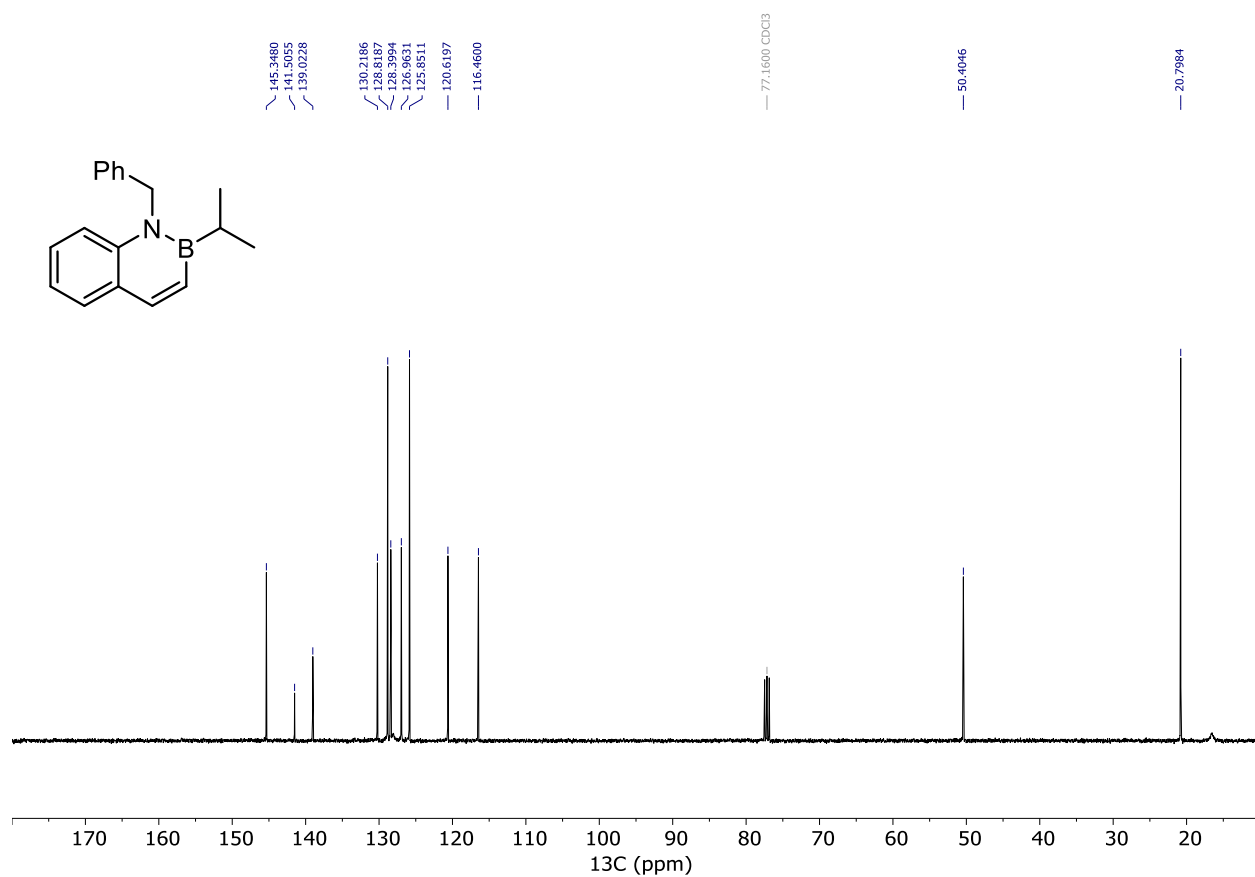

**Figure S23.** <sup>13</sup>C NMR Spectrum of (N-Benzyl)-2-isopropylborazonaphthalene (**4a**) in CDCl<sub>3</sub>.

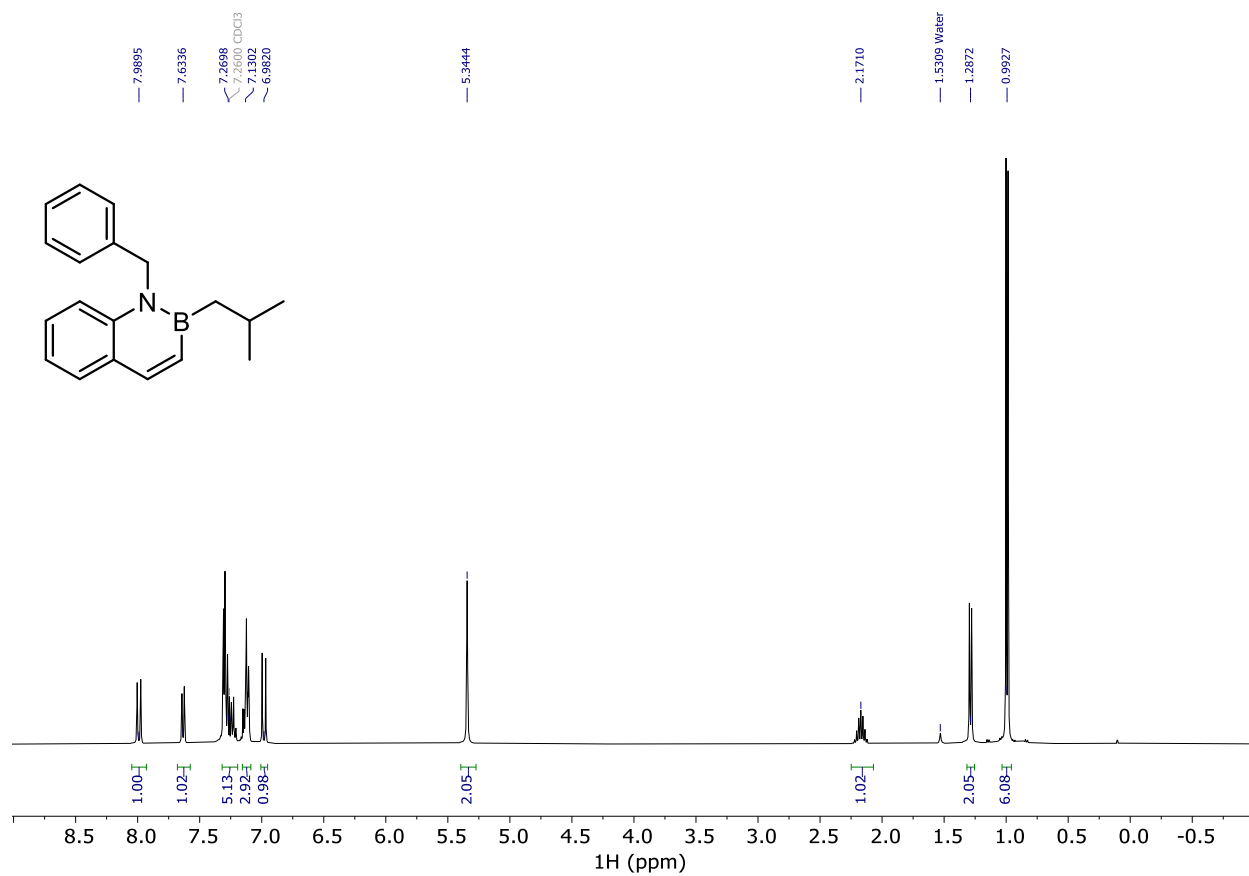

**Figure S24.** <sup>1</sup>H NMR Spectrum of (N-benzyl)-2-isobutylborazonaphthalene (**4b**) in CDCl<sub>3</sub>.

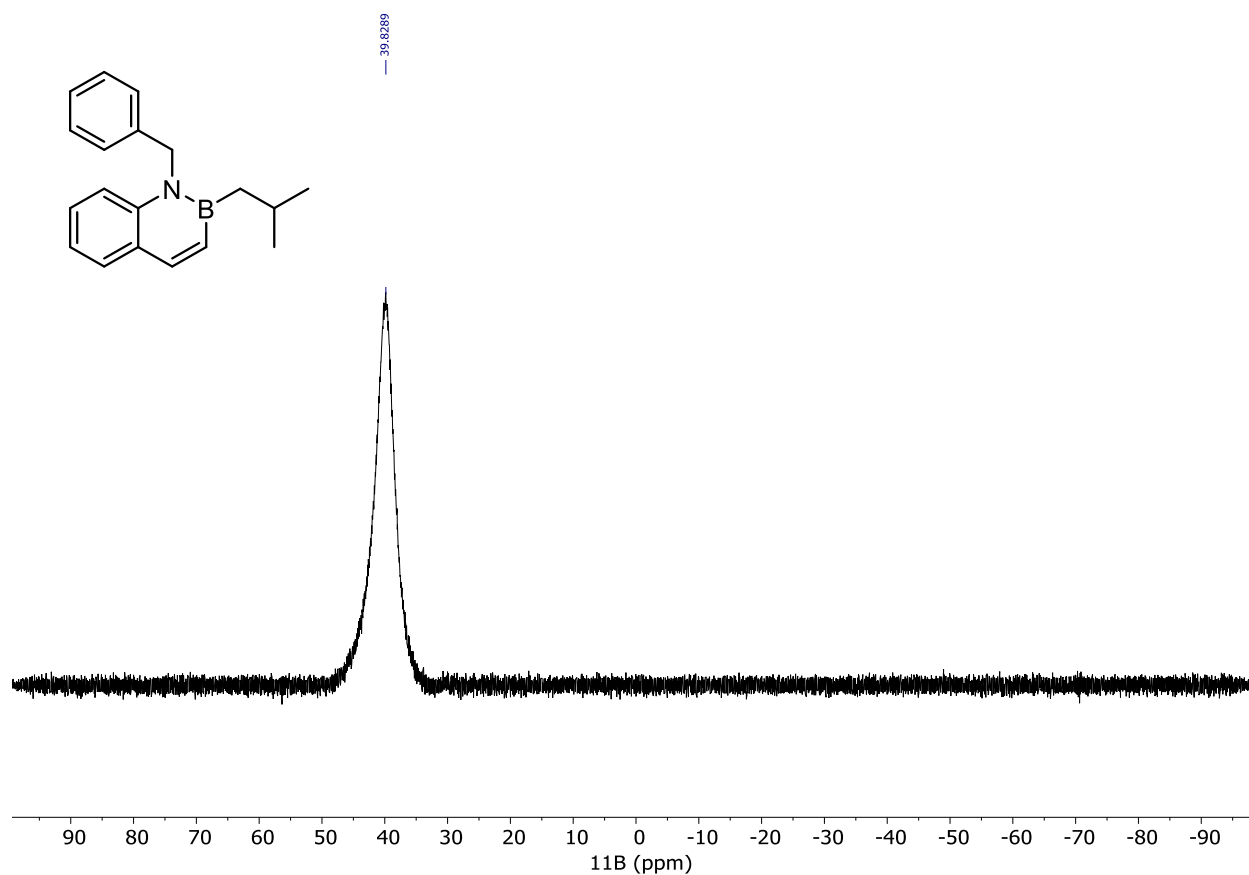

**Figure S25.**  $^{11}\text{B}$  NMR Spectrum of (N-benzyl)-2-isobutylborazonaphthalene (**4b**) in  $\text{CDCl}_3$ .

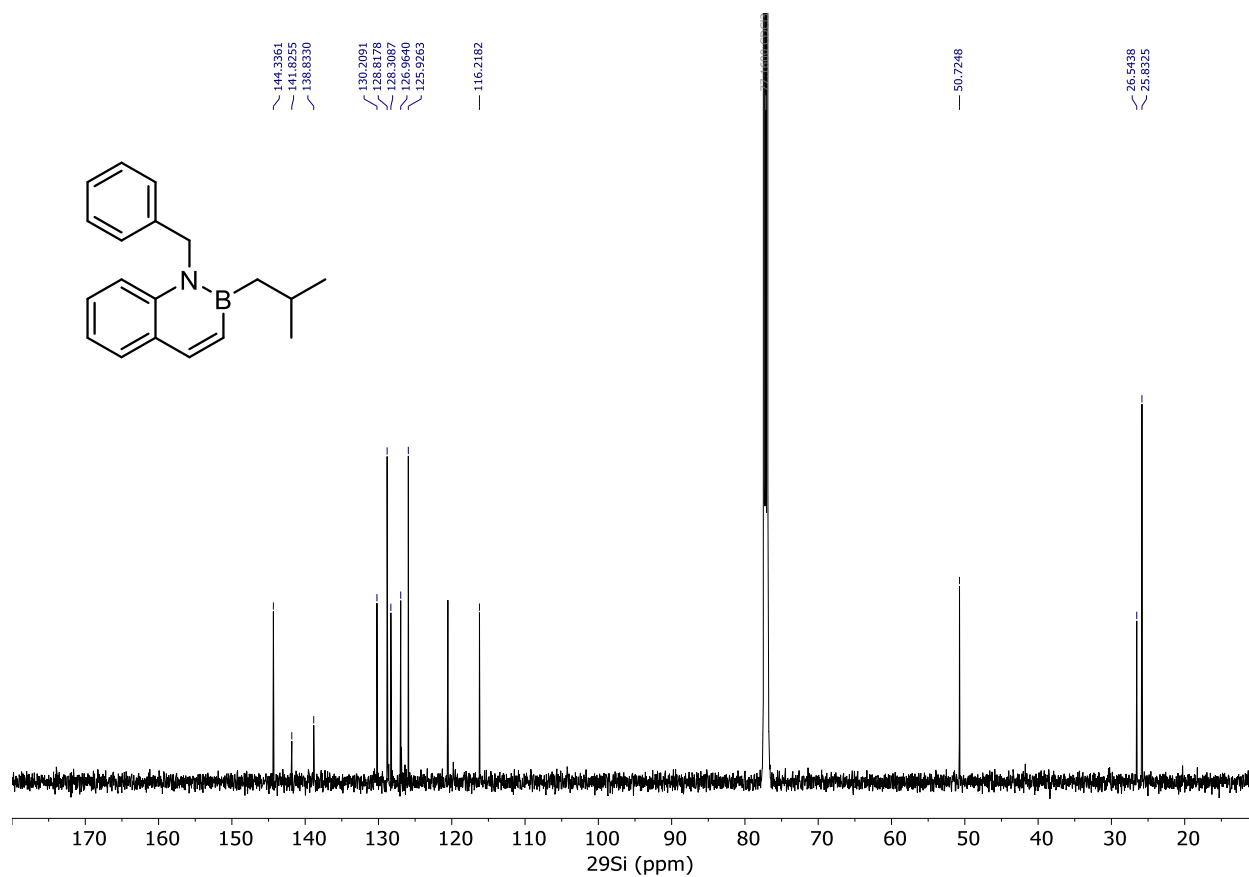

**Figure S26.** <sup>13</sup>C NMR Spectrum of (N-benzyl)-2-isobutylborazonaphthalene (**4b**) in CDCl<sub>3</sub>.

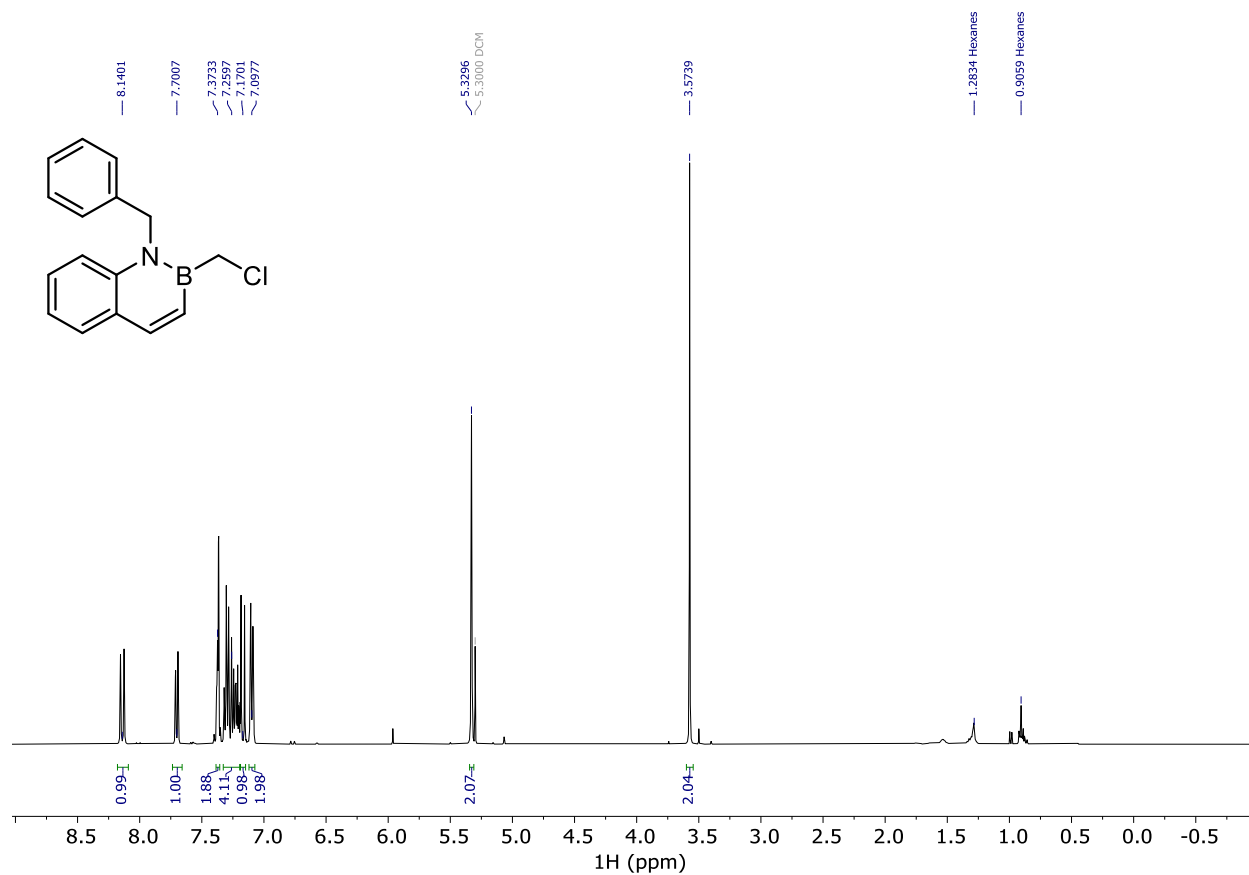

**Figure S27.** Spectrum of (N-benzyl)-2-(chloromethyl)borazonaphthalene (**4c**) in CDCl<sub>3</sub>.

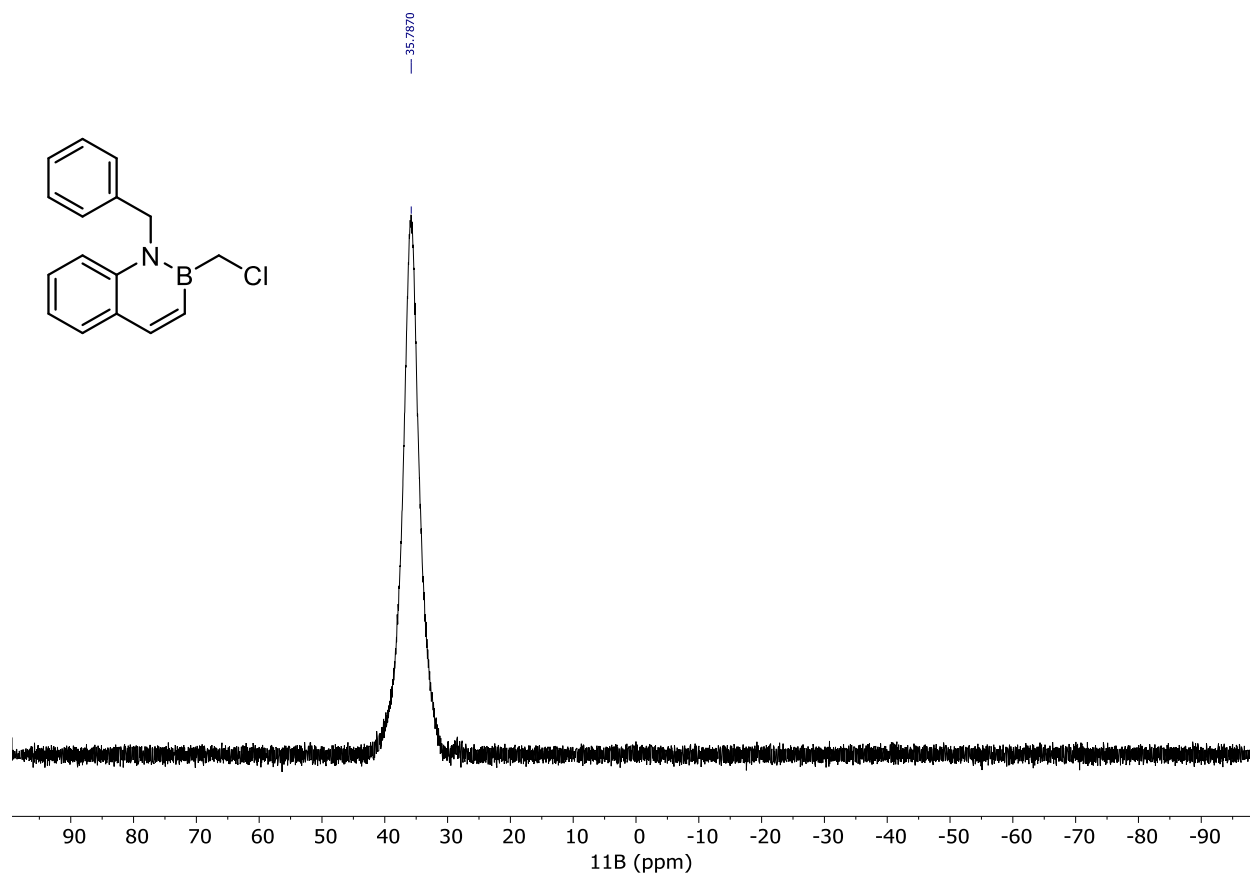

**Figure S28.**  $^{11}\text{B}$  NMR Spectrum of (N-benzyl)-2-(chloromethyl)borazonaphthalene (**4c**) in  $\text{CDCl}_3$ .

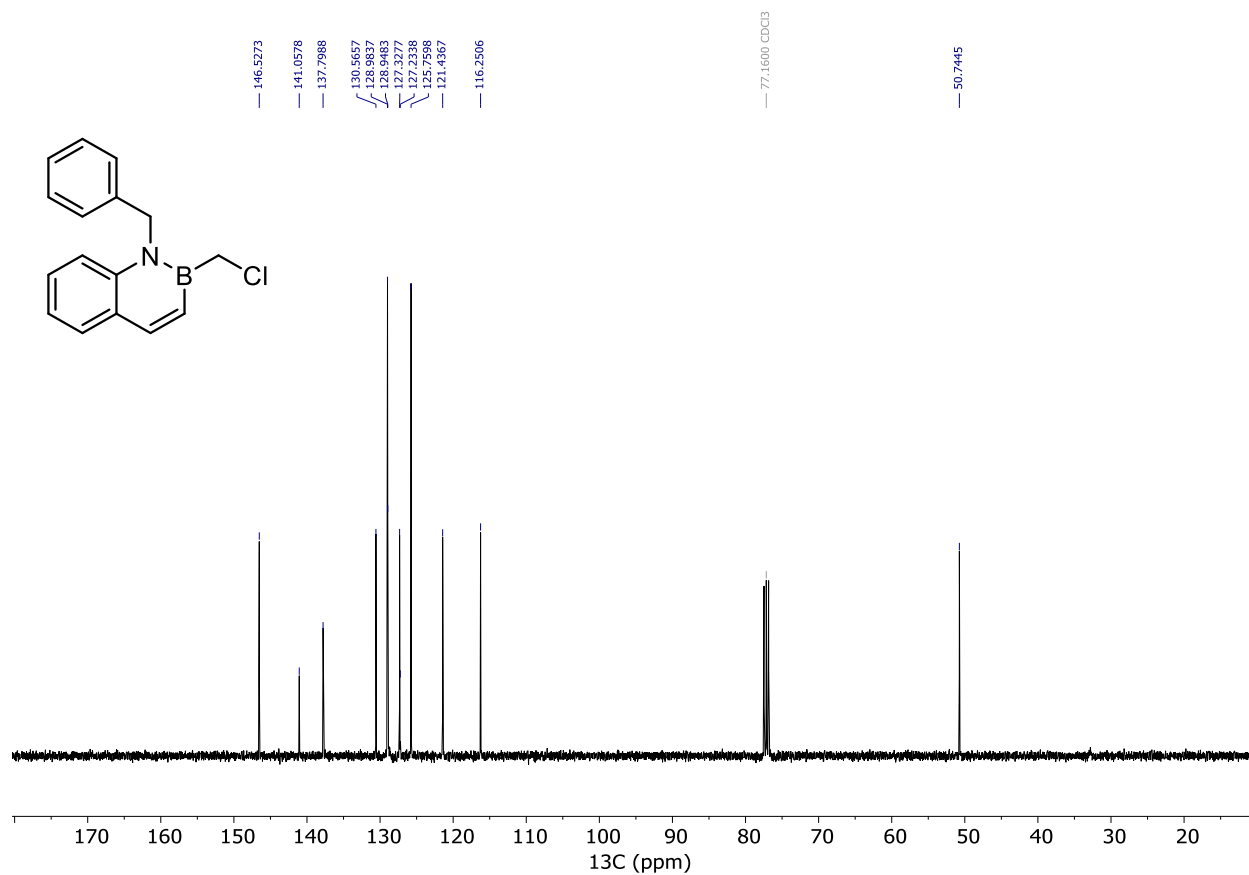

**Figure S29.** <sup>13</sup>C NMR Spectrum of (N-benzyl)-2-(chloromethyl)borazonaphthalene (**4c**) in CDCl<sub>3</sub>.



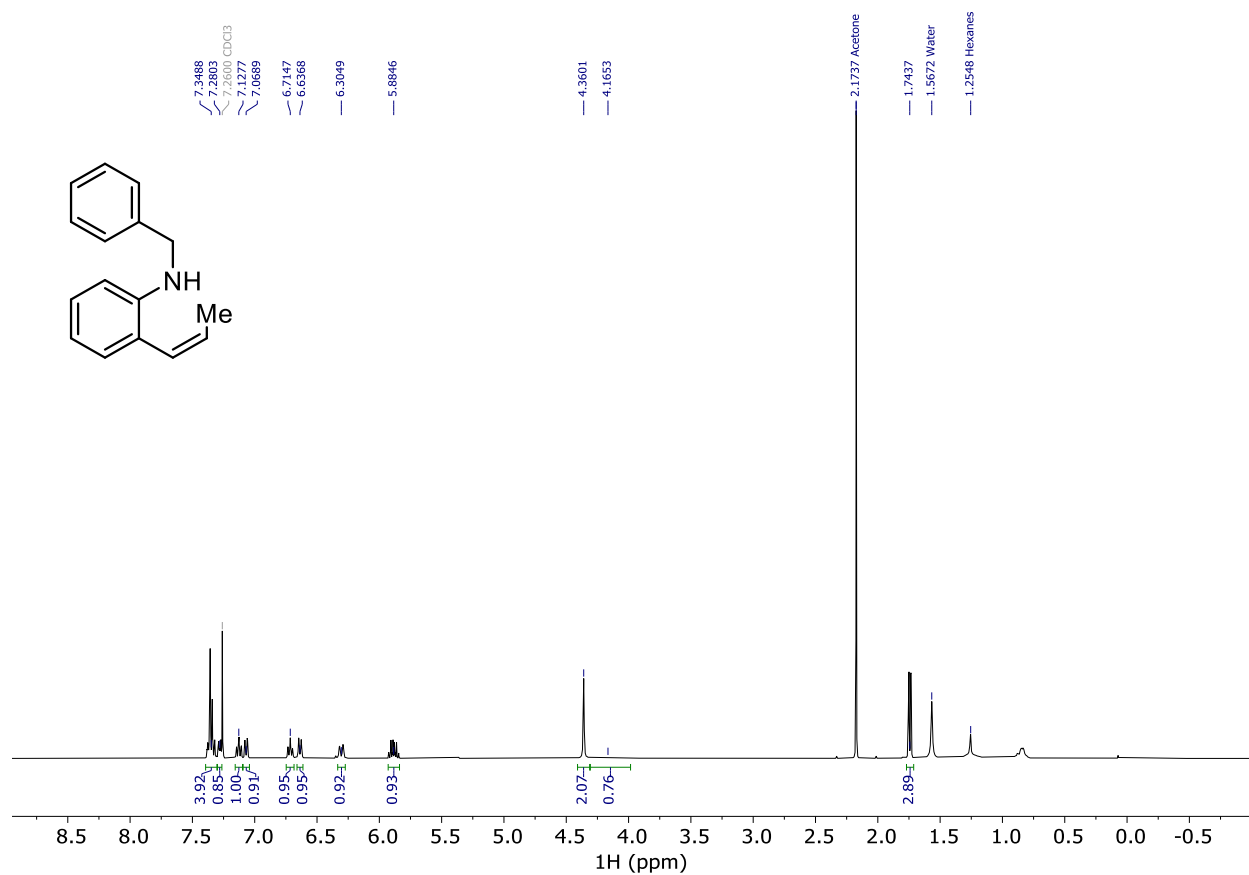

**Figure S30.** <sup>1</sup>H NMR Spectrum of (Z)-N-benzyl-2-(prop-1-en-1-yl)aniline (**5a**) in CDCl<sub>3</sub>.

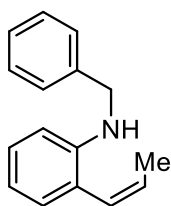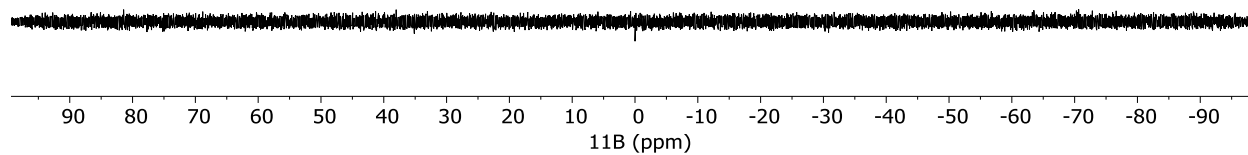

**Figure S31.**  $^{11}\text{B}$  NMR Spectrum of (Z)-N-benzyl-2-(prop-1-en-1-yl)aniline (**5a**) in  $\text{CDCl}_3$ .

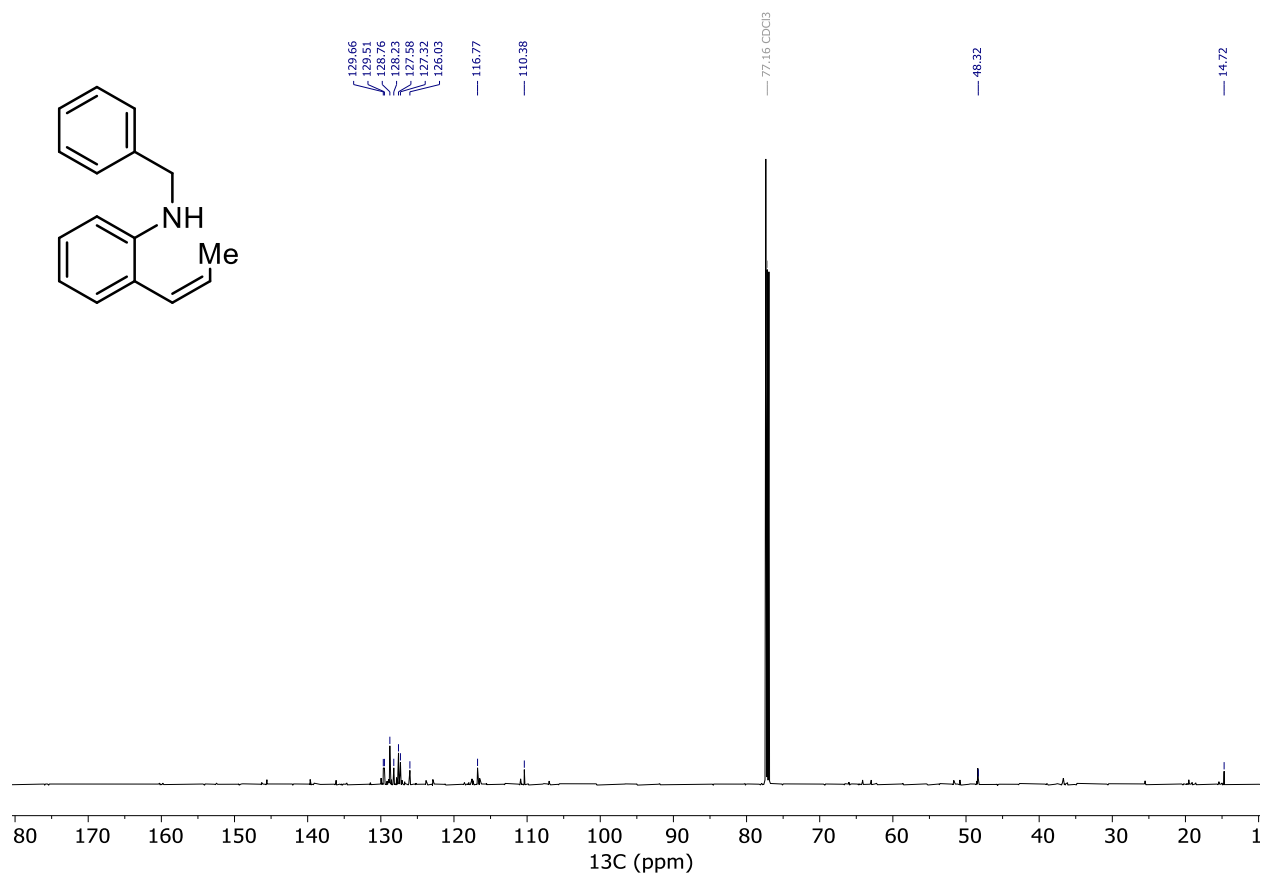

**Figure S32.** <sup>13</sup>C NMR Spectrum of (Z)-N-benzyl-2-(prop-1-en-1-yl)aniline (**5a**) in CDCl<sub>3</sub>.

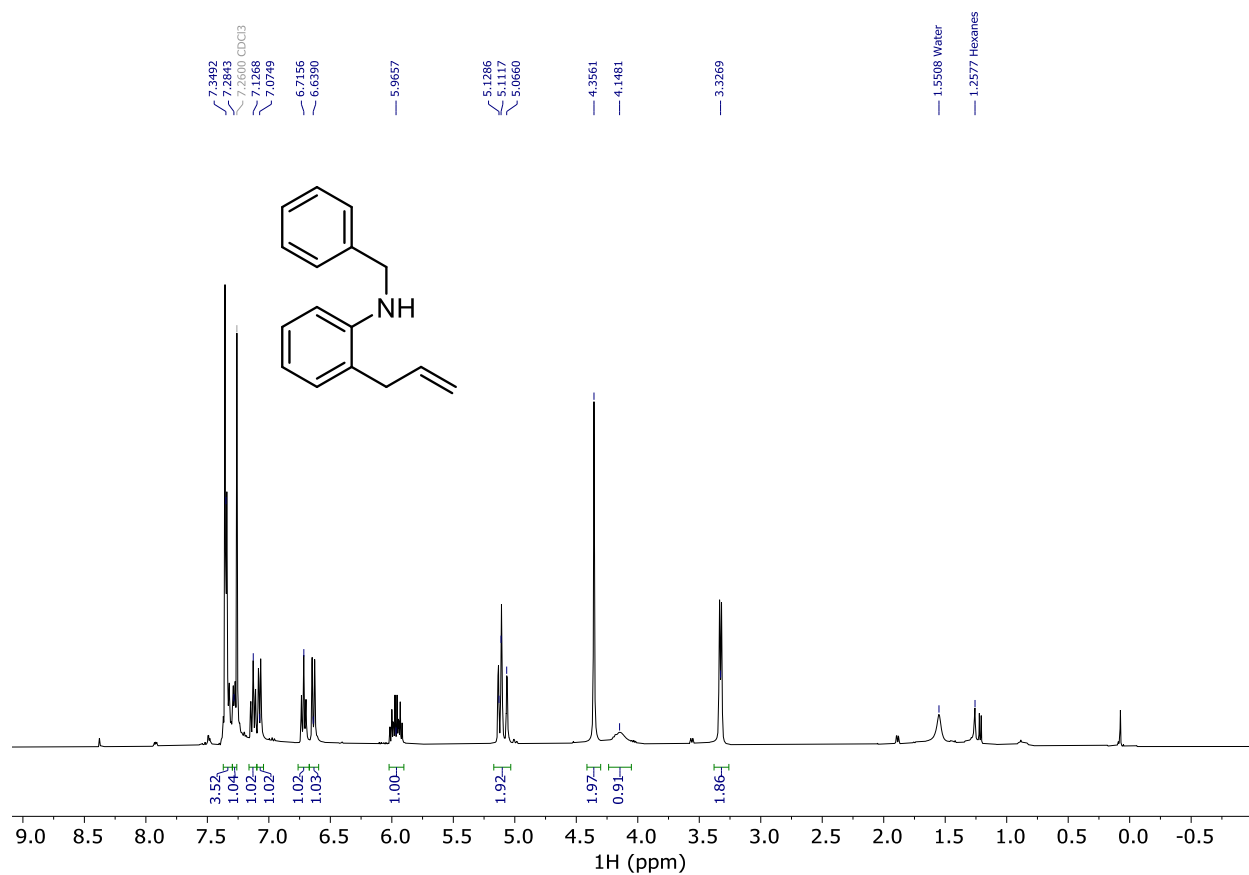

**Figure S33.** <sup>1</sup>H NMR Spectrum of 2-allyl-N-benzylaniline (**5b**) in CDCl<sub>3</sub>.

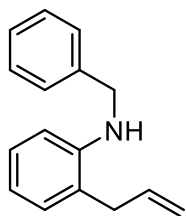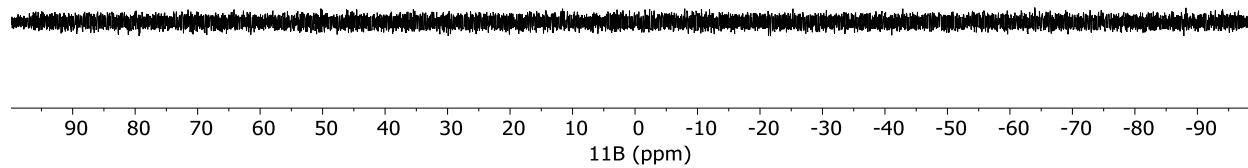

**Figure S34.**  $^{11}\text{B}$  NMR Spectrum of 2-allyl-*N*-benzylaniline (**5b**) in  $\text{CDCl}_3$ .

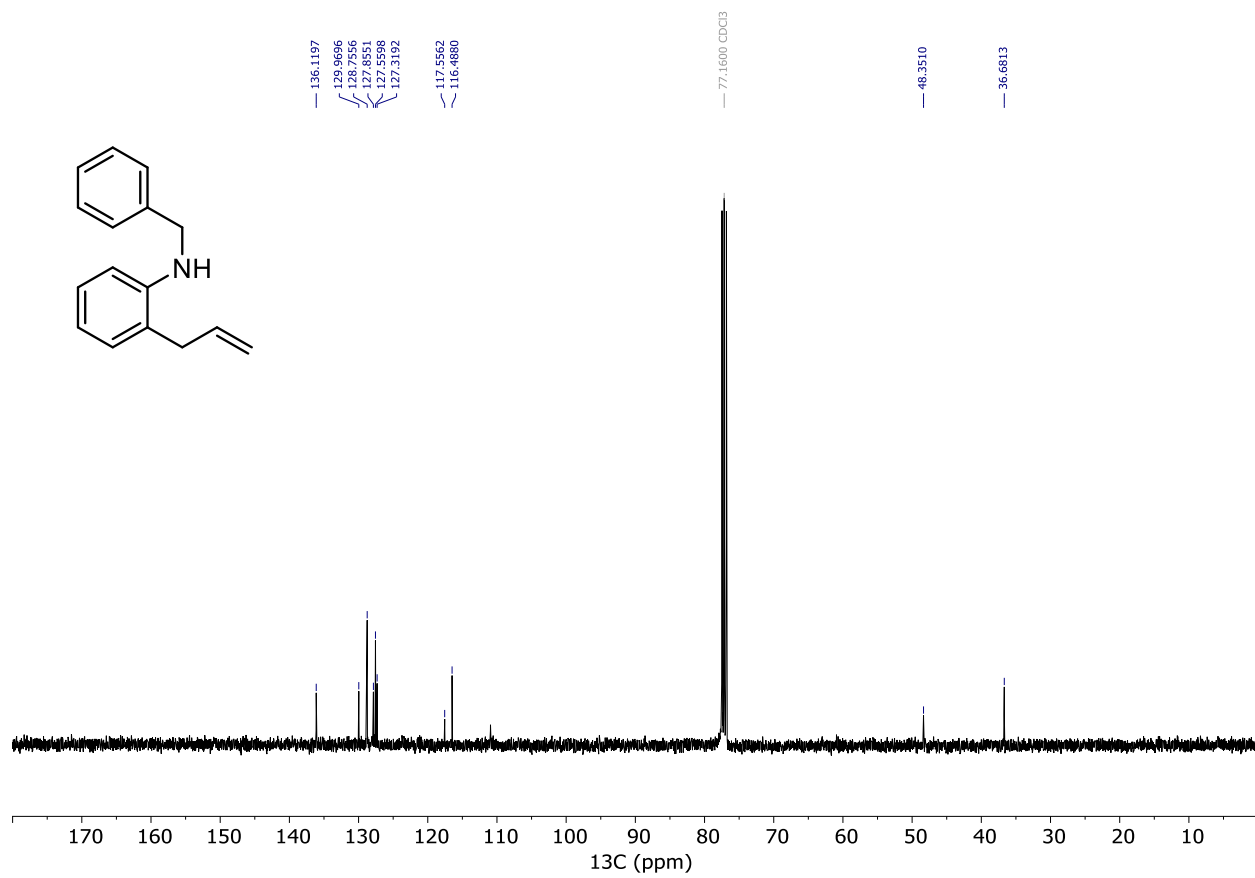

**Figure S35.** <sup>13</sup>C NMR Spectrum of 2-allyl-N-benzylaniline (**5b**) in CDCl<sub>3</sub>.

## 5 | Computational Methods

All calculations were performed in Gaussian 16. Geometry optimizations were done using the B3LYP density functional, Grimme's D3 dispersion correction with Becke-Johnson damping, and the def2-SVP basis set (B3LYP-D3(BJ)/def2-SVP).<sup>1</sup> Optimizations used the conductor-like polarizable continuum model (CPCM) with parameters for THF.<sup>2</sup> Harmonic frequency calculations were conducted analytically to confirm that optimized geometries had located minima on the potential energy surface and had no imaginary frequencies. Intrinsic reaction coordinate calculations were performed on all transition states confirming saddle points were connected via a minimum energy pathway between the two proposed intermediates, and harmonic frequency calculations were conducted to confirm that transition states had a single, strong imaginary frequency. All transition-state optimizations utilized the transit-guided quasi-Newtonian algorithm implemented in Gaussian 16<sup>3</sup>. Single-point energies were calculated at the B3LYP-D3(BJ)/def2-TZVP (SMD, THF) for all optimized DFT geometries, labelled B3LYP-D3(BJ)/def2-TZVP//B3LYP-D3(BJ)/def2-SVP (SMD, THF). All single-point calculations utilized the CPCM model to calculate the electrostatic solvation energy in addition to Truhlar's SMD solvation model (non-electrostatic component) with parameters for THF.<sup>4</sup>

## 6 | Computational Data

**Figure S36.** Optimized structure and atomic coordinates of **I•ZnCl<sub>2</sub>**

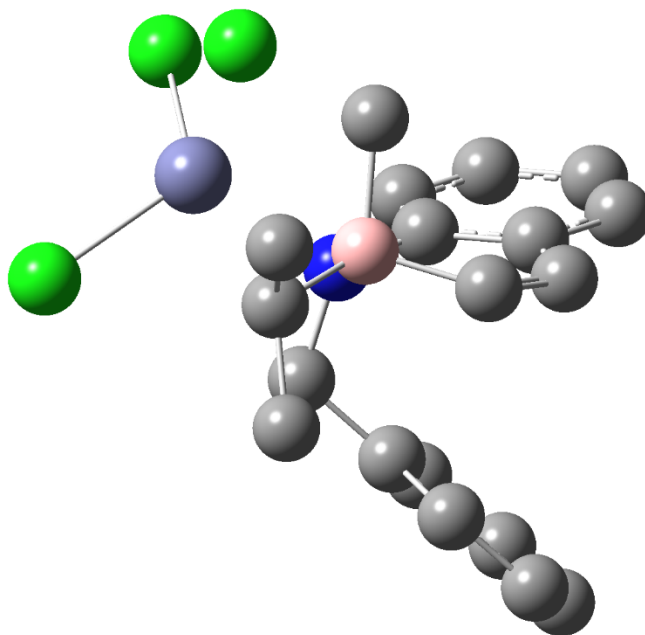

| Tag | Symbol | X          | Y          | Z          |
|-----|--------|------------|------------|------------|
| 1   | C      | -0.7569810 | 0.2757200  | -0.0224470 |
| 2   | H      | -1.1481480 | 1.2955330  | 0.0842460  |
| 3   | C      | -0.3803810 | -0.1292340 | -1.2500170 |
| 4   | H      | -0.4369910 | 0.5203760  | -2.1327950 |
| 5   | C      | 0.1405830  | -1.4773690 | -1.4822500 |
| 6   | C      | 0.3077320  | -1.9478580 | -2.7985250 |
| 7   | H      | 0.0225050  | -1.2889300 | -3.6236710 |
| 8   | C      | 0.8272760  | -3.2129670 | -3.0666370 |
| 9   | H      | 0.9438190  | -3.5527880 | -4.0987460 |
| 10  | C      | 1.1969060  | -4.0381710 | -2.0013900 |
| 11  | H      | 1.6040880  | -5.0352550 | -2.1861330 |
| 12  | C      | 1.0455250  | -3.5876150 | -0.6876490 |
| 13  | H      | 1.3318570  | -4.2460360 | 0.1319240  |
| 14  | C      | 0.5132180  | -2.3248990 | -0.4050130 |
| 15  | C      | 1.8738410  | -1.4620740 | 1.3759320  |
| 16  | H      | 2.4410800  | -2.3781410 | 1.5982160  |
| 17  | H      | 1.7990830  | -0.9235860 | 2.3238230  |
| 18  | C      | 2.6790960  | -0.6918240 | 0.3483020  |
| 19  | C      | 2.5189090  | 0.6837670  | 0.1268330  |
| 20  | H      | 1.7889180  | 1.2408840  | 0.7092770  |
| 21  | C      | 3.2729690  | 1.3463000  | -0.8451450 |



|    |    |            |            |            |
|----|----|------------|------------|------------|
| 22 | H  | 3.1314260  | 2.4189850  | -1.0002790 |
| 23 | C  | 4.2000060  | 0.6434200  | -1.6211210 |
| 24 | H  | 4.7850930  | 1.1618720  | -2.3849860 |
| 25 | C  | 4.3758210  | -0.7268540 | -1.4076180 |
| 26 | H  | 5.0990730  | -1.2886970 | -2.0040880 |
| 27 | C  | 3.6237570  | -1.3810760 | -0.4286900 |
| 28 | H  | 3.7612760  | -2.4529560 | -0.2684430 |
| 29 | B  | -0.7209320 | -0.7542330 | 1.2139960  |
| 30 | N  | 0.4709460  | -1.8444490 | 0.9701750  |
| 31 | C  | -0.6982840 | -0.0228920 | 2.6986450  |
| 32 | C  | -2.1184850 | -1.5811780 | 0.9711640  |
| 33 | H  | -3.0166730 | -0.9551960 | 1.0063600  |
| 34 | H  | -2.1372020 | -2.1809330 | 0.0529170  |
| 35 | C  | -2.0971830 | 0.5035810  | 3.0700850  |
| 36 | H  | -2.8326300 | -0.3051340 | 3.1844000  |
| 37 | H  | -2.0763780 | 1.0613070  | 4.0237690  |
| 38 | H  | -2.4832750 | 1.2005290  | 2.3041560  |
| 39 | C  | 0.2820400  | 1.1518390  | 2.8626850  |
| 40 | H  | 0.0847670  | 1.9452480  | 2.1205000  |
| 41 | H  | 0.1808810  | 1.6188470  | 3.8593250  |
| 42 | H  | 1.3370680  | 0.8664600  | 2.7571010  |
| 43 | Cl | -2.4476690 | -2.8742940 | 2.3117300  |
| 44 | Zn | 0.0213420  | -3.3863930 | 2.3481580  |
| 45 | Cl | 0.9802010  | -2.9422550 | 4.3573950  |
| 46 | Cl | -0.0755690 | -5.5979510 | 1.8600830  |
| 47 | H  | -0.4296460 | -0.7767290 | 3.4587530  |

Energy: -3977.74736792 hartree

**Figure S37.** Optimized structure and atomic coordinates of the ring-expansion transition state

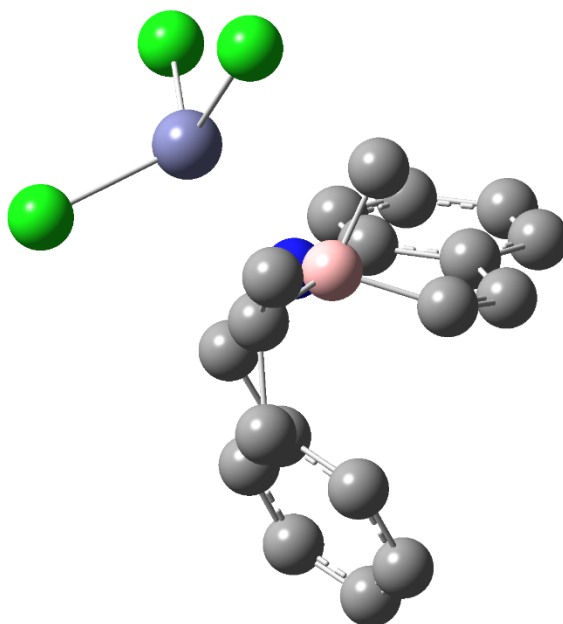

| Tag | Symbol | X          | Y          | Z          |
|-----|--------|------------|------------|------------|
| 1   | C      | -1.7992170 | 0.5340540  | -0.2941640 |
| 2   | H      | -2.2749050 | 1.5131090  | -0.1813820 |
| 3   | C      | -1.4784780 | 0.0907460  | -1.5328350 |
| 4   | H      | -1.6416060 | 0.7073120  | -2.4252530 |
| 5   | C      | -0.8373970 | -1.1985050 | -1.7556890 |
| 6   | C      | -0.6978580 | -1.6767420 | -3.0753980 |
| 7   | H      | -1.1317540 | -1.0871280 | -3.8875210 |
| 8   | C      | -0.0158040 | -2.8549380 | -3.3563040 |
| 9   | H      | 0.0788270  | -3.2073220 | -4.3858890 |
| 10  | C      | 0.5569360  | -3.5747260 | -2.3008310 |
| 11  | H      | 1.1030580  | -4.5006410 | -2.4969820 |
| 12  | C      | 0.4304090  | -3.1207660 | -0.9896770 |
| 13  | H      | 0.8617390  | -3.7053990 | -0.1797200 |
| 14  | C      | -0.2816720 | -1.9508980 | -0.6837990 |
| 15  | C      | 1.0513630  | -1.2362590 | 1.1944530  |
| 16  | H      | 1.5168090  | -2.1907510 | 1.4773410  |
| 17  | H      | 0.9482010  | -0.6870910 | 2.1355950  |
| 18  | C      | 2.0004630  | -0.5284720 | 0.2504740  |
| 19  | C      | 1.6988990  | 0.7019440  | -0.3537230 |
| 20  | H      | 0.7367320  | 1.1739550  | -0.1653380 |
| 21  | C      | 2.6114170  | 1.3196710  | -1.2121380 |
| 22  | H      | 2.3544100  | 2.2760020  | -1.6748900 |
| 23  | C      | 3.8467340  | 0.7211690  | -1.4821710 |
| 24  | H      | 4.5591350  | 1.2058460  | -2.1543490 |
| 25  | C      | 4.1586670  | -0.5050480 | -0.8890330 |
| 26  | H      | 5.1167690  | -0.9883670 | -1.0963130 |
| 27  | C      | 3.2386620  | -1.1222260 | -0.0362950 |

|    |    |            |            |            |
|----|----|------------|------------|------------|
| 28 | H  | 3.4805140  | -2.0891930 | 0.4130090  |
| 29 | B  | -1.4714090 | -0.4207320 | 1.0017970  |
| 30 | N  | -0.3316480 | -1.4823210 | 0.6768010  |
| 31 | C  | -1.3363700 | 0.3837390  | 2.4206850  |
| 32 | C  | -0.4079160 | 1.6082120  | 2.3823200  |
| 33 | H  | -0.7692090 | 2.3609310  | 1.6600400  |
| 34 | H  | -0.3599360 | 2.1057220  | 3.3677120  |
| 35 | H  | 0.6244520  | 1.3615920  | 2.0969800  |
| 36 | C  | -2.7054110 | 0.8160870  | 2.9662530  |
| 37 | H  | -3.2373440 | 1.4784560  | 2.2590450  |
| 38 | H  | -3.3504970 | -0.0523610 | 3.1622690  |
| 39 | H  | -2.6013500 | 1.3801730  | 3.9099650  |
| 40 | C  | -2.8762420 | -1.0152340 | 0.6511460  |
| 41 | H  | -3.0004800 | -1.7169990 | -0.1766590 |
| 42 | H  | -3.7883820 | -0.4596040 | 0.8761300  |
| 43 | Cl | -3.3748670 | -2.7513990 | 2.2045950  |
| 44 | Zn | -1.0418890 | -3.1022630 | 2.0306660  |
| 45 | Cl | -0.0000130 | -2.7179110 | 4.0304440  |
| 46 | Cl | -0.7158110 | -5.2352600 | 1.2983650  |
| 47 | H  | -0.9233900 | -0.3292940 | 3.1547110  |

Energy: -3977.73881757 hartree

Imaginary frequency: -254.74

**Figure S38.** Optimized geometry of **6•ZnCl<sub>3</sub>**

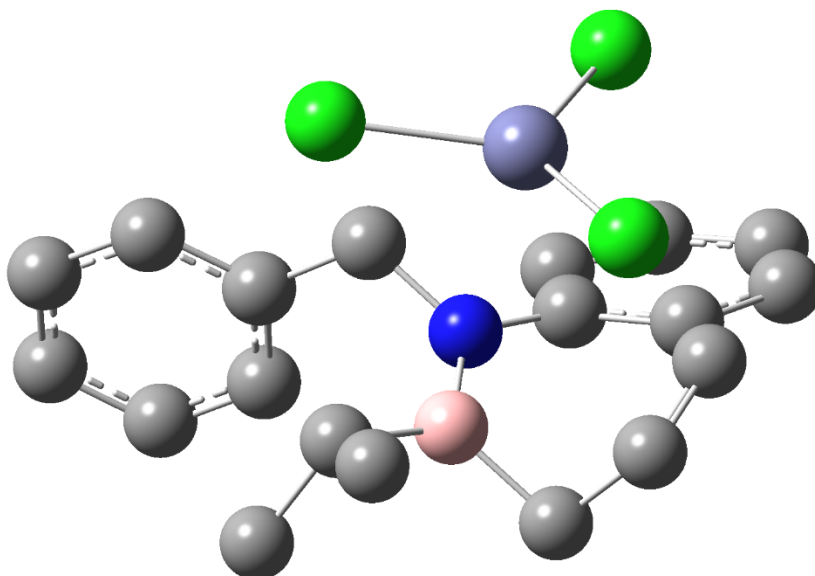

| Tag | Symbol | X         | Y          | Z          |
|-----|--------|-----------|------------|------------|
| 1   | C      | 4.5701700 | 0.5996010  | 16.7231330 |
| 2   | H      | 3.9858200 | 0.4370000  | 15.8131510 |
| 3   | C      | 4.9824670 | -0.4709590 | 17.4298350 |
| 4   | H      | 4.8029120 | -1.4769500 | 17.0410470 |
| 5   | C      | 5.6777300 | -0.3708640 | 18.7136690 |
| 6   | C      | 6.7240950 | -1.2751580 | 18.9884190 |
| 7   | H      | 6.9880590 | -2.0018290 | 18.2152870 |
| 8   | C      | 7.4142010 | -1.2697920 | 20.1951660 |
| 9   | H      | 8.2261310 | -1.9793620 | 20.3708780 |
| 10  | C      | 7.0495230 | -0.3449240 | 21.1811860 |
| 11  | H      | 7.5795010 | -0.3145080 | 22.1364090 |
| 12  | C      | 5.9999750 | 0.5387060  | 20.9496200 |
| 13  | H      | 5.7189400 | 1.2402830  | 21.7352490 |
| 14  | C      | 5.2900650 | 0.5481590  | 19.7306610 |
| 15  | C      | 3.2844680 | 1.4692160  | 20.7853350 |
| 16  | H      | 3.5599930 | 0.6587790  | 21.4749220 |
| 17  | H      | 2.2498130 | 1.2493640  | 20.4933300 |
| 18  | C      | 3.3155590 | 2.7974160  | 21.5079180 |
| 19  | C      | 4.4281870 | 3.6488180  | 21.4720200 |
| 20  | H      | 5.2983760 | 3.3699050  | 20.8750800 |
| 21  | C      | 4.4232000 | 4.8625790  | 22.1666370 |
| 22  | H      | 5.2996880 | 5.5141830  | 22.1241640 |
| 23  | C      | 3.2997430 | 5.2471350  | 22.9043530 |
| 24  | H      | 3.2926210 | 6.1981300  | 23.4424970 |
| 25  | C      | 2.1794920 | 4.4092130  | 22.9381510 |
| 26  | H      | 1.2900840 | 4.7063580  | 23.4996910 |

|    |    |           |            |            |
|----|----|-----------|------------|------------|
| 27 | C  | 2.1892760 | 3.1973650  | 22.2436310 |
| 28 | H  | 1.3049870 | 2.5538190  | 22.2535540 |
| 29 | B  | 3.7906030 | 2.0836790  | 18.4078960 |
| 30 | N  | 4.1502190 | 1.3811680  | 19.5990010 |
| 31 | C  | 2.4398650 | 2.9134210  | 18.2621030 |
| 32 | C  | 2.7584130 | 4.4203550  | 18.3288700 |
| 33 | H  | 3.4573400 | 4.7168510  | 17.5275050 |
| 34 | H  | 1.8427080 | 5.0242540  | 18.2007340 |
| 35 | H  | 3.2141100 | 4.7033350  | 19.2894120 |
| 36 | C  | 1.7031570 | 2.5895670  | 16.9506070 |
| 37 | H  | 2.3209230 | 2.8336640  | 16.0694710 |
| 38 | H  | 1.4265780 | 1.5283550  | 16.8765960 |
| 39 | H  | 0.7759690 | 3.1834340  | 16.8681610 |
| 40 | C  | 4.8083500 | 2.0037690  | 17.1947870 |
| 41 | H  | 5.8486540 | 2.1264340  | 17.5428590 |
| 42 | H  | 4.6061430 | 2.7403070  | 16.4064450 |
| 43 | Cl | 0.0331180 | 0.2900400  | 19.5937670 |
| 44 | Zn | 1.6298670 | -1.0034440 | 18.6220400 |
| 45 | Cl | 1.4643430 | -1.3793040 | 16.4099050 |
| 46 | Cl | 2.9961620 | -2.1427960 | 19.9829370 |
| 47 | H  | 1.7490050 | 2.6762430  | 19.0846500 |

Energy: -3977.81850111 hartree

## 7 | Single Crystal X-Ray Crystallography Data

### 2-isopropylborazonaphthalene (3a)

All reflection intensities were measured at 110.00(10) K using a Rigaku XtaLAB Synergy R (equipped with a rotating-anode X-ray source and HyPix-6000HE detector) with Cu  $K\alpha$  radiation ( $\lambda = 1.54178 \text{ \AA}$ ) under the program CrysAlisPro (Version CrysAlisPro 1.171.42.49, Rigaku OD, 2022). The same program was used to refine the cell dimensions and for data reduction. The structure was solved with the program SHELXT-2018/2 (Sheldrick, 2018) and was refined on  $F^2$  with SHELXL-2019/3 (Sheldrick, 2018)<sup>5</sup>. Analytical numeric absorption correction using a multifaceted crystal model was applied using CrysAlisPro. The temperature of the data collection was controlled using the system Cryostream 1000 from Oxford Cryosystems. The H atoms were placed at calculated positions using the instructions AFIX 13, AFIX 43 or AFIX 137 with isotropic displacement parameters having values 1.2 or 1.5  $U_{eq}$  of the attached C atoms. The H atom attached to N1 was found from difference Fourier map, and its coordinates were refined pseudofreely using the DFIX instruction in order to keep the N–H distance to be within an acceptable range.

The structure is ordered. The absolute configuration could not be established by anomalous-dispersion effects in diffraction measurements on the crystal as there are no anomalous scatterers in the crystal.

**Table S1. Crystallographic data for 2-isopropylborazonaphthalene**

|                                                                                                                | <b>2-isopropylborazonaphthalene</b>                                                                                                                                                                                                                                                                                                                                                                        |
|----------------------------------------------------------------------------------------------------------------|------------------------------------------------------------------------------------------------------------------------------------------------------------------------------------------------------------------------------------------------------------------------------------------------------------------------------------------------------------------------------------------------------------|
| Crystal data                                                                                                   |                                                                                                                                                                                                                                                                                                                                                                                                            |
| Chemical formula                                                                                               | C <sub>11</sub> H <sub>14</sub> BN                                                                                                                                                                                                                                                                                                                                                                         |
| <i>M<sub>r</sub></i>                                                                                           | 171.04                                                                                                                                                                                                                                                                                                                                                                                                     |
| Crystal system, space group                                                                                    | Monoclinic, <i>P</i> 2 <sub>1</sub>                                                                                                                                                                                                                                                                                                                                                                        |
| Temperature (K)                                                                                                | 110                                                                                                                                                                                                                                                                                                                                                                                                        |
| <i>a</i> , <i>b</i> , <i>c</i> (Å)                                                                             | 5.80606 (12), 7.55044 (15), 11.4439 (2)                                                                                                                                                                                                                                                                                                                                                                    |
| $\beta$ (°)                                                                                                    | 96.1273 (19)                                                                                                                                                                                                                                                                                                                                                                                               |
| <i>V</i> (Å <sup>3</sup> )                                                                                     | 498.82 (2)                                                                                                                                                                                                                                                                                                                                                                                                 |
| <i>Z</i>                                                                                                       | 2                                                                                                                                                                                                                                                                                                                                                                                                          |
| Radiation type                                                                                                 | Cu <i>K</i> α                                                                                                                                                                                                                                                                                                                                                                                              |
| $\mu$ (mm <sup>-1</sup> )                                                                                      | 0.49                                                                                                                                                                                                                                                                                                                                                                                                       |
| Crystal size (mm)                                                                                              | 0.45 × 0.32 × 0.04                                                                                                                                                                                                                                                                                                                                                                                         |
| Data collection                                                                                                |                                                                                                                                                                                                                                                                                                                                                                                                            |
| Diffractometer                                                                                                 | XtaLAB Synergy R, HyPix                                                                                                                                                                                                                                                                                                                                                                                    |
| Absorption correction                                                                                          | Analytical<br><i>CrysAlis PRO</i> 1.171.43.90 (Rigaku Oxford Diffraction, 2023)<br>Analytical numeric absorption correction using a multifaceted crystal model based on expressions derived by R.C. Clark & J.S. Reid. (Clark, R. C. & Reid, J. S. (1995). <i>Acta Cryst.</i> A51, 887-897)<br>Empirical absorption correction using spherical harmonics, implemented in SCALE3 ABSPACK scaling algorithm. |
| <i>T<sub>min</sub></i> , <i>T<sub>max</sub></i>                                                                | 0.864, 0.982                                                                                                                                                                                                                                                                                                                                                                                               |
| No. of measured, independent and observed [ <i>I</i> > 2σ( <i>I</i> )] reflections                             | 10074, 1904, 1857                                                                                                                                                                                                                                                                                                                                                                                          |
| <i>R<sub>int</sub></i>                                                                                         | 0.025                                                                                                                                                                                                                                                                                                                                                                                                      |
| (sin $\theta/\lambda$ ) <sub>max</sub> (Å <sup>-1</sup> )                                                      | 0.616                                                                                                                                                                                                                                                                                                                                                                                                      |
| Refinement                                                                                                     |                                                                                                                                                                                                                                                                                                                                                                                                            |
| <i>R</i> [ <i>F</i> <sup>2</sup> > 2σ( <i>F</i> <sup>2</sup> )], <i>wR</i> ( <i>F</i> <sup>2</sup> ), <i>S</i> | 0.031, 0.088, 1.09                                                                                                                                                                                                                                                                                                                                                                                         |
| No. of reflections                                                                                             | 1904                                                                                                                                                                                                                                                                                                                                                                                                       |
| No. of parameters                                                                                              | 124                                                                                                                                                                                                                                                                                                                                                                                                        |
| No. of restraints                                                                                              | 2                                                                                                                                                                                                                                                                                                                                                                                                          |
| H-atom treatment                                                                                               | H atoms treated by a mixture of independent and constrained                                                                                                                                                                                                                                                                                                                                                |

|                                                             |                                                                                                                             |
|-------------------------------------------------------------|-----------------------------------------------------------------------------------------------------------------------------|
|                                                             | refinement                                                                                                                  |
| $\Delta\rho_{\max}, \Delta\rho_{\min}$ (e Å <sup>-3</sup> ) | 0.17, -0.13                                                                                                                 |
| Absolute structure                                          | Flack x determined using 823 quotients [(I+)-(I-)]/[(I+)+(I-)] (Parsons, Flack and Wagner, Acta Cryst. B69 (2013) 249-259). |
| Absolute structure parameter                                | 0.25 (19)                                                                                                                   |

#### (N-benzyl)-2-isopropylborazonaphthalene (4a)

All reflection intensities were measured at 243.00(10) K\* using a Rigaku XtaLAB Synergy R (equipped with a rotating-anode X-ray source and HyPix-6000HE detector) with Cu K $\alpha$  radiation ( $\lambda$  = 1.54178 Å) under the program CrysAlisPro (Version CrysAlisPro 1.171.42.49, Rigaku OD, 2022). The same program was used to refine the cell dimensions and for data reduction. The structure was solved with the program SHELXT-2018/2 (Sheldrick, 2018) and was refined on  $F^2$  with SHELXL-2019/3 (Sheldrick, 2018)<sup>5</sup>. Analytical numeric absorption correction using a multifaceted crystal model was applied using CrysAlisPro. The temperature of the data collection was controlled using the system Cryostream 1000 from Oxford Cryosystems. The H atoms were placed at calculated positions using the instructions AFIX 13, AFIX 23, AFIX 43 or AFIX 137 with isotropic displacement parameters having values 1.2 or 1.5  $U_{\text{eq}}$  of the attached C atoms.

\*The crystal was initially flash-cooled from room temperature to 110 K, but the resulting diffraction pattern indicated non-single crystal behavior. However, when cooled more gradually to 243 K, the crystal behaved as a single crystal, producing a clean diffraction pattern

The structure is ordered.



**Table S2. Crystallographic data for (N-benzyl)-2-isopropylborazonaphthalene**

|                                                                                                                | (N-benzyl)-2-isopropylborazonaphthalene                                                                                                                                                                                                                                                                                                                                                                    |
|----------------------------------------------------------------------------------------------------------------|------------------------------------------------------------------------------------------------------------------------------------------------------------------------------------------------------------------------------------------------------------------------------------------------------------------------------------------------------------------------------------------------------------|
| Crystal data                                                                                                   |                                                                                                                                                                                                                                                                                                                                                                                                            |
| Chemical formula                                                                                               | C <sub>18</sub> H <sub>20</sub> BN                                                                                                                                                                                                                                                                                                                                                                         |
| <i>M<sub>r</sub></i>                                                                                           | 261.16                                                                                                                                                                                                                                                                                                                                                                                                     |
| Crystal system, space group                                                                                    | Orthorhombic, <i>Pbca</i>                                                                                                                                                                                                                                                                                                                                                                                  |
| Temperature (K)                                                                                                | 243                                                                                                                                                                                                                                                                                                                                                                                                        |
| <i>a</i> , <i>b</i> , <i>c</i> (Å)                                                                             | 9.63386 (7), 8.72627 (8), 36.3137 (3)                                                                                                                                                                                                                                                                                                                                                                      |
| <i>V</i> (Å <sup>3</sup> )                                                                                     | 3052.81 (4)                                                                                                                                                                                                                                                                                                                                                                                                |
| <i>Z</i>                                                                                                       | 8                                                                                                                                                                                                                                                                                                                                                                                                          |
| Radiation type                                                                                                 | Cu <i>K</i> α                                                                                                                                                                                                                                                                                                                                                                                              |
| μ (mm <sup>-1</sup> )                                                                                          | 0.48                                                                                                                                                                                                                                                                                                                                                                                                       |
| Crystal size (mm)                                                                                              | 0.54 × 0.31 × 0.28                                                                                                                                                                                                                                                                                                                                                                                         |
| Data collection                                                                                                |                                                                                                                                                                                                                                                                                                                                                                                                            |
| Diffractometer                                                                                                 | XtaLAB Synergy R, HyPix                                                                                                                                                                                                                                                                                                                                                                                    |
| Absorption correction                                                                                          | Analytical<br><i>CrysAlis PRO</i> 1.171.43.90 (Rigaku Oxford Diffraction, 2023)<br>Analytical numeric absorption correction using a multifaceted crystal model based on expressions derived by R.C. Clark & J.S. Reid. (Clark, R. C. & Reid, J. S. (1995). <i>Acta Cryst.</i> A51, 887-897)<br>Empirical absorption correction using spherical harmonics, implemented in SCALE3 ABSPACK scaling algorithm. |
| <i>T<sub>min</sub></i> , <i>T<sub>max</sub></i>                                                                | 0.858, 0.910                                                                                                                                                                                                                                                                                                                                                                                               |
| No. of measured, independent and observed [ <i>I</i> > 2σ( <i>I</i> )] reflections                             | 32666, 2988, 2794                                                                                                                                                                                                                                                                                                                                                                                          |
| <i>R<sub>int</sub></i>                                                                                         | 0.018                                                                                                                                                                                                                                                                                                                                                                                                      |
| (sin θ/λ) <sub>max</sub> (Å <sup>-1</sup> )                                                                    | 0.617                                                                                                                                                                                                                                                                                                                                                                                                      |
| Refinement                                                                                                     |                                                                                                                                                                                                                                                                                                                                                                                                            |
| <i>R</i> [ <i>F</i> <sup>2</sup> > 2σ( <i>F</i> <sup>2</sup> )], <i>wR</i> ( <i>F</i> <sup>2</sup> ), <i>S</i> | 0.044, 0.120, 1.06                                                                                                                                                                                                                                                                                                                                                                                         |
| No. of reflections                                                                                             | 2988                                                                                                                                                                                                                                                                                                                                                                                                       |
| No. of parameters                                                                                              | 184                                                                                                                                                                                                                                                                                                                                                                                                        |
| H-atom treatment                                                                                               | H-atom parameters constrained                                                                                                                                                                                                                                                                                                                                                                              |
| Δρ <sub>max</sub> , Δρ <sub>min</sub> (e Å <sup>-3</sup> )                                                     | 0.19, -0.24                                                                                                                                                                                                                                                                                                                                                                                                |

**(N-benzyl)-2-(chloromethyl)borazonaphthalene (4c)**

All reflection intensities were measured at 110.00(10) K using a Rigaku XtaLAB Synergy R (equipped with a rotating-anode X-ray source and HyPix-6000HE detector) with Cu  $K\alpha$  radiation ( $\lambda = 1.54178 \text{ \AA}$ ) under the program CrysAlisPro (Version CrysAlisPro 1.171.42.49, Rigaku OD, 2022). The same program was used to refine the cell dimensions and for data reduction. The structure was solved with the program SHELXT-2018/2 (Sheldrick, 2018) and was refined on  $F^2$  with SHELXL-2019/3 (Sheldrick, 2018)<sup>5</sup>. Analytical numeric absorption correction using a multifaceted crystal model was applied using CrysAlisPro. The temperature of the data collection was controlled using the system Cryostream 1000 from Oxford Cryosystems. The H atoms were placed at calculated positions using the instructions AFIX 23 or AFIX 43 with isotropic displacement parameters having values 1.2  $U_{eq}$  of the attached C atoms.

The structure is mostly ordered. The asymmetric unit contains one molecule of the target compound and one site that includes some amount of very disordered lattice solvent molecules (possibly dichloromethane), and the latter contribution was removed from the final refinement using the SQUEEZE procedure in Platon (Spek, 2009)<sup>6</sup>.

**Table S3. Crystallographic data for (N-benzyl)-2-(chloromethyl)borazonaphthalene**

|                                                                                                                | (N-benzyl)-2-(chloromethyl)borazonaphthalene                                                                                                                                                                                                                                                                                                                                                               |
|----------------------------------------------------------------------------------------------------------------|------------------------------------------------------------------------------------------------------------------------------------------------------------------------------------------------------------------------------------------------------------------------------------------------------------------------------------------------------------------------------------------------------------|
| Crystal data                                                                                                   |                                                                                                                                                                                                                                                                                                                                                                                                            |
| Chemical formula                                                                                               | C <sub>16</sub> H <sub>15</sub> BClN                                                                                                                                                                                                                                                                                                                                                                       |
| <i>M<sub>r</sub></i>                                                                                           | 267.55                                                                                                                                                                                                                                                                                                                                                                                                     |
| Crystal system, space group                                                                                    | Triclinic, <i>P</i> -1                                                                                                                                                                                                                                                                                                                                                                                     |
| Temperature (K)                                                                                                | 110                                                                                                                                                                                                                                                                                                                                                                                                        |
| <i>a</i> , <i>b</i> , <i>c</i> (Å)                                                                             | 8.15626 (17), 8.98468 (18), 11.7166 (2)                                                                                                                                                                                                                                                                                                                                                                    |
| $\alpha$ , $\beta$ , $\gamma$ (°)                                                                              | 100.8560 (17), 93.9083 (17), 108.2052 (19)                                                                                                                                                                                                                                                                                                                                                                 |
| <i>V</i> (Å <sup>3</sup> )                                                                                     | 793.58 (3)                                                                                                                                                                                                                                                                                                                                                                                                 |
| <i>Z</i>                                                                                                       | 2                                                                                                                                                                                                                                                                                                                                                                                                          |
| Radiation type                                                                                                 | Cu <i>K</i> α                                                                                                                                                                                                                                                                                                                                                                                              |
| $\mu$ (mm <sup>-1</sup> )                                                                                      | 1.99                                                                                                                                                                                                                                                                                                                                                                                                       |
| Crystal size (mm)                                                                                              | 0.24 × 0.15 × 0.13                                                                                                                                                                                                                                                                                                                                                                                         |
| Data collection                                                                                                |                                                                                                                                                                                                                                                                                                                                                                                                            |
| Diffractometer                                                                                                 | XtaLAB Synergy R, HyPix                                                                                                                                                                                                                                                                                                                                                                                    |
| Absorption correction                                                                                          | Analytical<br><i>CrysAlis PRO</i> 1.171.43.90 (Rigaku Oxford Diffraction, 2023)<br>Analytical numeric absorption correction using a multifaceted crystal model based on expressions derived by R.C. Clark & J.S. Reid. (Clark, R. C. & Reid, J. S. (1995). <i>Acta Cryst.</i> A51, 887-897)<br>Empirical absorption correction using spherical harmonics, implemented in SCALE3 ABSPACK scaling algorithm. |
| <i>T<sub>min</sub></i> , <i>T<sub>max</sub></i>                                                                | 0.737, 0.833                                                                                                                                                                                                                                                                                                                                                                                               |
| No. of measured, independent and observed [ <i>I</i> > 2σ( <i>I</i> )] reflections                             | 25296, 3103, 3047                                                                                                                                                                                                                                                                                                                                                                                          |
| <i>R<sub>int</sub></i>                                                                                         | 0.022                                                                                                                                                                                                                                                                                                                                                                                                      |
| (sin $\theta/\lambda$ ) <sub>max</sub> (Å <sup>-1</sup> )                                                      | 0.616                                                                                                                                                                                                                                                                                                                                                                                                      |
| Refinement                                                                                                     |                                                                                                                                                                                                                                                                                                                                                                                                            |
| <i>R</i> [ <i>F</i> <sup>2</sup> > 2σ( <i>F</i> <sup>2</sup> )], <i>wR</i> ( <i>F</i> <sup>2</sup> ), <i>S</i> | 0.034, 0.089, 1.06                                                                                                                                                                                                                                                                                                                                                                                         |
| No. of reflections                                                                                             | 3103                                                                                                                                                                                                                                                                                                                                                                                                       |
| No. of parameters                                                                                              | 173                                                                                                                                                                                                                                                                                                                                                                                                        |
| H-atom treatment                                                                                               | H-atom parameters constrained                                                                                                                                                                                                                                                                                                                                                                              |
| Δρ <sub>max</sub> , Δρ <sub>min</sub> (e Å <sup>-3</sup> )                                                     | 0.26, -0.34                                                                                                                                                                                                                                                                                                                                                                                                |

Computer programs: *CrysAlis PRO* 1.171.42.49 (Rigaku OD, 2022), *SHELXT2018/2* (Sheldrick, 2018), *SHELXL2019/3* (Sheldrick, 2018), *SHELXTL* v6.10 (Sheldrick, 2008).

## 8 | References

<sup>1</sup>a) Becke, A. D. *J. Chem. Phys.* **1993**, *98*, 5648-5652. <https://doi.org/10.1063/1.464913>; b) Weigend, F.; Ahlrichs, R. *Phys. Chem. Chem. Phys.* **2005**, *7*, 3297-3305. <https://doi.org/10.1039/B508541A>; c) Grimme, S.; Antony, J.; Ehrlich, S.; Krieg, H. *J. Chem. Phys.* **2010**, *132*, 154104. <https://doi.org/10.1063/1.3382344>

<sup>2</sup>Barone, V.; Cossi, M. *J. Phys. Chem. A* **1998**, *102*, 1995-2001. <https://doi.org/10.1021/jp9716997>

<sup>3</sup>Ayala, P. Y.; Bernhard Schlegel, H. *J. Chem. Phys.* **1997**, *107*, 375-384. <https://doi.org/10.1063/1.474398>

<sup>4</sup>A. V. Marenich; C. J. Cramer; D. G. Truhlar, *J. Phys. Chem. B* **2009**, *113*, 6378-6396. <https://doi.org/10.1021/jp810292n>

<sup>5</sup>Sheldrick, G. M. *Acta Cryst.* **2015**, *C71*, 3-8. <https://doi.org/10.1107/S2053229614024218>

<sup>6</sup>Plek, A, L. *Acta Cryst.* **2009**, *D65*, 148-55. <https://doi.org/10.1107/S090744490804362X>
